# Supplementary material
Source: publisher figshare collection journal article supplement (https://acs.figshare.com/ndownloader/files/4735159)
Supplement: Supplementary file 1 [file 4735159]

## Total synthesis of flustramine C via dimethylallyl rearrangement

Thomas Lindel\*, Laura Bräuchle, Gregor Golz, Petra Böhrer

Ludwig Maximilian University of Munich, Department of Chemistry and Biochemistry,  
Butenandtstr. 5-13, D-81377 Munich, Germany; fax int+ (0)89/2180-7-7734, e-mail:  
thomas.lindel@cup.uni-muenchen.de

### Supporting Information: experimental procedures and characterization

**General.** NMR spectra were recorded on a Varian VRX 400S (399.9 MHz *resp.* 100.6 MHz) spectrometer, with the solvent used as internal standard. Mass spectra were recorded on Finnigan MAT95Q and Varian MAT-311 spectrometers. IR and UV spectra were recorded on Perkin-Elmer PE 1600 FT-IR and Perkin-Elmer UV/Vis-spectrometer Lambda 16, respectively. HPLC isolations were performed using Varian Prep Star 218, equipped with a Varian Pro Star 320 UV/Vis detector. A Merck LiChroprep RP-18 (25–40  $\mu\text{m}$ , 250  $\times$  210) semipreparative HPLC column was used. Elemental analyses were obtained from the Microanalytical Laboratory of the Faculty of Chemistry and Pharmacy (LMU Munich).

***N*<sub>b</sub>-Formyl-*N*<sub>b</sub>-methyltryptamine.** A mixture of Ac<sub>2</sub>O and HCO<sub>2</sub>H (19.0 ml, 1:1) was stirred at 60 °C for 1 h. After cooling to rt a solution of *N*<sub>b</sub>-methyltryptamine (**4**, 10.0 g, 57.4 mmol) in DCM (100 ml) was added dropwise. After 90 min the reaction mixture was added to conc. NaOH (150 ml) and ice (150 g). The alkaline mixture was diluted with DCM (300 ml) and the aqueous layer was extracted twice with DCM (100 ml). The combined organic layers were washed with 2 M HCl (100 ml) and 3x with water, dried over Na<sub>2</sub>SO<sub>4</sub>, filtered and concentrated in vacuo. The resulting viscous oil was dried further by stirring at 70 °C in high vacuum. Et<sub>2</sub>O was added and concentrated in vacuo, affording the product (10.4 g, 51.7 mmol, 90%) as a brownish, semicrystalline oil. *R*<sub>f</sub>(silica, EtOAc) = 0.3. Ratio of rotamers in

CDCl<sub>3</sub>: 1.6:1. Major rotamer: <sup>1</sup>H NMR (400 MHz, CDCl<sub>3</sub>):  $\delta$  = 8.73 (s, 1 H, 1-H), 7.73 (s, 1 H, CHO), 7.55 (d, <sup>3</sup>*J* = 7.8 Hz, 1 H, 7-H), 7.34 (d, <sup>3</sup>*J* = 8.0 Hz, 1 H, 4-H), 7.19 (dd, <sup>3</sup>*J* = 7.8, 7.0 Hz, 1 H, 6-H), 7.13 (dd, <sup>3</sup>*J* = 8.0, 7.0 Hz, 1 H, 5-H), 6.90 (s, 1 H, 2-H), 3.51 (m, 2 H, 2'-H), 2.98 (m, 2 H, 1'-H), 2.93 (s, 3 H, NCH<sub>3</sub>). <sup>13</sup>C NMR (100 MHz, CDCl<sub>3</sub>):  $\delta$  = 163.4 (CHO), 136.9 (C-7a), 127.7 (C-3a), 122.9 (C-2), 122.5 (C-6), 119.8 (C-5), 118.9 (C-7), 113.3 (C-3), 111.8 (C-4), 50.5 (C-2'), 30.1 (CH<sub>3</sub>), 24.7 (C-1'). Minor rotamer: <sup>1</sup>H NMR (400 MHz, CDCl<sub>3</sub>):  $\delta$  = 8.65 (s, 1 H, 1-H), 8.04 (s, 1 H, CHO), 7.64 (d, <sup>3</sup>*J* = 7.8 Hz, 1 H, 7-H), 7.34 (d, <sup>3</sup>*J* = 8.0 Hz, 1 H, 4-H), 7.16 (dd, <sup>3</sup>*J* = 7.7, 7.0 Hz, 1 H, 6-H), 7.10 (dd, <sup>3</sup>*J* = 7.7, 7.0 Hz, 1 H, 5-H), 6.98 (s, 1 H, 2-H), 3.66 (m, 2 H, 2'-H), 3.00 (m, 2 H, 1'-H), 2.87 (s, 3 H, NCH<sub>3</sub>). <sup>13</sup>C NMR (100 MHz, CDCl<sub>3</sub>):  $\delta$  = 163.2 (CHO), 136.8 (C-7a), 127.2 (C-3a), 122.6 (C-2), 122.3 (C-6), 119.7 (C-5), 118.5 (C-7), 112.7 (C-3), 111.6 (C-4), 45.4 (C-2'), 35.4 (NCH<sub>3</sub>), 23.2 (C-1'). MS (EI, 70 eV): *m/z* (%) = 202 (8) [*M*<sup>+</sup>], 143 (78), 130 (100), 103 (5), 77 (5). HRMS (EI): calcd. 202.1106 (C<sub>12</sub>H<sub>14</sub>N<sub>2</sub>O), found 202.1097. IR (KBr):  $\tilde{\nu}$  = 3275 cm<sup>-1</sup>, 3010, 2964, 2934, 2884, 1658, 1617, 1492, 1451, 1434, 1397, 1368, 1350, 1335, 1249, 1230, 1179, 1099, 1076, 1061, 1008, 932, 876, 810, 766, 756, 628, 427. UV/Vis (CH<sub>3</sub>CN):  $\lambda_{\max}$  ( $\epsilon$ ) = 289 nm (5257 mol<sup>-1</sup>dm<sup>3</sup>cm<sup>-1</sup>), 280 (6165), 222 (36416). Calcd. for C<sub>17</sub>H<sub>22</sub>N<sub>2</sub>O: C 71.26, H 6.98, N 13.85; found C 71.15, H 6.95, N 13.70.

***N*-{2'-[2-(1'',1''-Dimethyl-allyl)-1*H*-indol-3-yl]-ethyl}-*N*-methylformamide (5).** To a solution of *N*<sub>b</sub>-Formyl-*N*<sub>b</sub>-methyltryptamine (2.02 g, 10.0 mmol) in THF (36 ml) and Et<sub>3</sub>N (1.66 ml, 12.0 mmol) was added *t*-BuOCl (1.36 ml, 12.0 mmol) at -78 °C. The colorless solution was stirred for 30 min at -78 °C, before a freshly prepared solution of prenyl-9-BBN (0.5 M, 40.0 ml, 20.0 mmol) in THF was added dropwise. It proved to be beneficial, if 1,1-dimethylallene and 9-BBN-H were allowed to react for 18 h at room temperature before use. After 30 min the yellow solution was allowed to warm to rt and was stirred for 1 h. Aqueous NaOH (3 M, 10 ml) and H<sub>2</sub>O<sub>2</sub> (30%, 10 ml) were added dropwise. The mixture was stirred at

rt for 1 h and diluted in Et<sub>2</sub>O (400 ml). The organic layer was washed three times with semisaturated solution of NaCl, dried over Na<sub>2</sub>SO<sub>4</sub>, filtered, and concentrated in vacuo. The residual oil was washed twice with Et<sub>2</sub>O (10 ml) affording **5** (2.16 g, 8.0 mmol, 80%) as colorless solid. Further purification was possible by recrystallisation in *n*-heptane/toluene (5:1). Mp.: 146-147 °C. *R<sub>f</sub>*(silica, *iso*-hexane/EtOAc (1:1)) = 0.4. Ratio of rotamers in CDCl<sub>3</sub>: 1.6:1. Major rotamer: <sup>1</sup>H NMR (400 MHz, CDCl<sub>3</sub>): δ = 8.29 (s, 1 H, 1-H), 8.05 (s, 1 H, CHO), 7.65 (d, <sup>3</sup>*J* = 7.2 Hz, 1 H, 7-H), 7.46 (d, <sup>3</sup>*J* = 7.3 Hz, 1 H, 4-H), 7.35-7.08 (m, 2 H, 6-H, 5-H), 6.13 (dd, <sup>3</sup>*J* = 17.4, 10.5 Hz, 1 H, 2''-H), 5.23-5.14 (m, 2 H, 3''-H), 3.49-3.42 (m, 2 H, 2'-H), 3.10-3.04 (m, 2 H, 1'-H), 2.99 (s, 3 H, NCH<sub>3</sub>), 1.54 (s, 6 H, 4''-H, 5''-H). <sup>13</sup>C NMR (100 MHz, CDCl<sub>3</sub>): δ = 162.6 (CHO), 145.8 (C-2''), 140.2 (C-2), 134.3 (C-3a), 129.1 (C-7a), 121.6 (C-6), 119.4 (C-7), 117.5 (C-4), 111.9 (C-3''), 110.5 (C-5), 106.7 (C-3), 50.2 (C-2'), 38.8 (C-1''), 35.0 (NCH<sub>3</sub>), 27.7 (C-4'', C-5'') 25.0 (C-1'). Minor rotamer: <sup>1</sup>H NMR (400 MHz, CDCl<sub>3</sub>): δ = 8.16 (s, 1 H, CHO), 8.09 (s, 1 H, 1-H), 7.64 (d, <sup>3</sup>*J* = 6.8 Hz, 1 H, 7-H), 7.46 (d, <sup>3</sup>*J* = 6.9 Hz, 1 H, 4-H), 7.35-7.08 (m, 2 H, 6-H, 5-H), 6.14 (dd, <sup>3</sup>*J* = 17.4, 10.5 Hz, 1 H, 2''-H), 5.23-5.14 (m, 2 H, 3''-H), 3.58-3.52 (m, 2 H, 2'-H), 3.10-3.04 (m, 2 H, 1'-H), 2.96 (s, 3 H, NCH<sub>3</sub>), 1.57 (s, 6 H, 4''-H, 5''-H). <sup>13</sup>C NMR (100 MHz, CDCl<sub>3</sub>): δ = 162.4 (CHO), 145.9 (C-2''), 139.9 (C-2), 134.2 (C-3a), 129.5 (C-7a), 119.9 (C-6), 119.4 (C-7), 117.5 (C-4), 112.0 (C-3''), 110.8 (C-5), 107.6 (C-3), 45.5 (C-2'), 38.9 (C-1''), 30.0 (NCH<sub>3</sub>), 27.6 (C-4'', C-5''), 22.7 (C-1'). MS (EI, 70 eV): *m/z* (%) = 270 (100) [M<sup>+</sup>], 211 (79), 199 (43), 196 (53), 183 (95), 168 (78), 154 (10), 130 (7), 72 (4), 44 (8). HRMS (EI): calcd. 270.1732 (C<sub>17</sub>H<sub>22</sub>N<sub>2</sub>O, [M<sup>+</sup>]), found 270.1757. IR (KBr):  $\tilde{\nu}$  = 3303 cm<sup>-1</sup>, 3053, 2968, 2930, 2872, 1654, 1578, 1490, 1460, 1434, 1392, 1360, 1340, 1297, 1242, 1168, 1147, 1068, 1045, 1005, 914, 742, 724, 688, 583, 533, 423. UV/Vis (CH<sub>3</sub>CN):  $\lambda_{max}$  ( $\epsilon$ ) = 283 nm (3670 mol<sup>-1</sup>dm<sup>3</sup>cm<sup>-1</sup>), 226 (18949). Calcd. for C<sub>17</sub>H<sub>22</sub>N<sub>2</sub>O: C 75.52, H 10.36, N 8.20; found C 75.12, H 10.20, N 8.20.

**Flustrabromine (6).** To a stirred solution of **5** (2.16 g, 8.0 mmol) in HOAc-HCO<sub>2</sub>H (64 ml, 3:1) was added a solution of NBS (1.46 g, 8.2 mmol) in HOAc-HCO<sub>2</sub>H (40 ml, 3:1). The solution was stirred at rt for 30 min, before the solution was added to a mixture of Et<sub>2</sub>O (250 ml) and ice (250 g). It was diluted with Et<sub>2</sub>O (300 ml). The organic layer was washed twice with H<sub>2</sub>O (200 ml) and with aqueous NaOH (1 M, 150 ml). It was washed twice with H<sub>2</sub>O (200 ml), dried over Na<sub>2</sub>SO<sub>4</sub>, filtered and concentrated in vacuo. The crude solid was washed 3 x with MeOH (10 ml). Remaining solvent was removed under reduced pressure, affording **6** (1.71 g, 4.9 mmol, 61%) and 4-brominated side product as a colorless solids which were separated by chromatography. *R<sub>f</sub>* = (silica, *iso*-hexane/EtOAc (1:1)): 0.43. Ratio of rotamers in CDCl<sub>3</sub>: 1:0.8. Mp.: 218-220 °C. Major rotamer: <sup>1</sup>H NMR (400 MHz, CDCl<sub>3</sub>): δ = 7.99 (s, 1 H, CHO), 7.91 (s, 1 H, 1-H), 7.49 (d, <sup>3</sup>*J* = 8.4 Hz, 1 H, 4-H), 7.46 (d, <sup>4</sup>*J* = 1.7 Hz, 1 H, 7-H), 7.20 (dd, <sup>3</sup>*J* = 8.4 Hz, <sup>4</sup>*J* = 1.7 Hz, 1 H, 5-H), 6.13-6.08 (dd, <sup>3</sup>*J* = 17.5, 10.4 Hz, 1 H, 2''-H), 5.21-5.15 (dd, <sup>3</sup>*J* = 17.5 Hz, <sup>2</sup>*J* = 1.2 Hz, 1 H, 3''-H<sub>E</sub>), 5.21-5.15 (dd, <sup>3</sup>*J* = 10.4 Hz, <sup>2</sup>*J* = 1.2 Hz, 1 H, 3''-H<sub>Z</sub>), 3.53-3.38 (m, 2H, 2'-H), 3.06-2.99 (m, 2H, 1'-H), 2.96 (s, 3H, NCH<sub>3</sub>), 1.52 (s, 6H, 4''-H, 5''-H). <sup>13</sup>C NMR (100 MHz, DMSO-*d*<sub>6</sub>): δ = 162.5 (CHO), 145.5 (C-2''), 140.9 (C-2), 135.0 (C-7a), 128.1 (C-3a), 122.9 (C-5), 119.9 (C-4), 115.0 (C-6), 113.7 (C-7), 112.4 (C-3''), 107.1 (C-3), 50.2 (C-2'), 38.9 (C-1''), 30.1 (NCH<sub>3</sub>), 27.6 (C-5'', C-4''), 24.9 (C-1'). Minor rotamer: <sup>1</sup>H NMR (400 MHz, CDCl<sub>3</sub>): δ = 8.07 (s, 1 H, CHO), 8.00 (s, 1 H, 1-H), 7.43 (d, <sup>4</sup>*J* = 1.7 Hz, 1 H, 7-H), 7.29 (d, <sup>3</sup>*J* = 8.4 Hz, 1 H, 4-H), 7.19 (dd, <sup>3</sup>*J* = 8.4 Hz, <sup>4</sup>*J* = 1.7 Hz, 1 H, 5-H), 6.13-6.08 (dd, <sup>3</sup>*J* = 17.6, 10.4 Hz, 1 H, 2''-H), 5.21-5.15 (dd, <sup>3</sup>*J* = 17.6 Hz, <sup>2</sup>*J* = 1.2 Hz, 1 H, 3''-H<sub>E</sub>), 5.21-5.15 (dd, <sup>3</sup>*J* = 10.4 Hz, <sup>2</sup>*J* = 1.2 Hz, 1 H, 3''-H<sub>Z</sub>), 3.53-3.38 (m, 2H, 2'-H), 3.06-2.99 (m, 2H, 1'-H), 2.95 (s, 3H, NCH<sub>3</sub>), 1.55 (s, 6H, 4''-H, 5''-H). <sup>13</sup>C NMR (100 MHz, CDCl<sub>3</sub>): δ = 162.5 (CHO), 145.5 (C-2''), 140.5 (C-2), 134.9 (C-7a), 128.5 (C-3a), 122.7 (C-5), 119.5 (C-4), 114.9 (C-6), 113.4 (C-7), 112.3 (C-3''), 108.0 (C-3), 45.5 (C-2'), 39.0 (C-1''), 35.1 (NCH<sub>3</sub>), 27.6 (C-5'', C-4''), 22.6 (C-1'). MS (FAB<sup>+</sup>, NBA): *m/z* (%) = 371/373 (6/6) [M<sup>+</sup> + Na], 349/351 (36/33) [M<sup>+</sup> + 1], 276/278 (29/26) [C<sub>14</sub>H<sub>14</sub>BrN<sup>+</sup> + 1]. HRMS (EI): calcd.

348.0837 ( $\text{C}_{17}\text{H}_{21}^{79}\text{BrN}_2\text{O}$ ,  $[\text{M}^+]$ ), found 348.0838. IR (KBr):  $\tilde{\nu} = 3435\text{ cm}^{-1}$ , 2970, 2930, 2872, 1657, 1571, 1463, 1394, 1335, 1285, 1225, 1193, 1165, 1070, 909, 861, 803, 725, 696, 591. UV/Vis ( $\text{CH}_3\text{CN}$ ):  $\lambda_{\text{max}} (\epsilon) = 289\text{ nm}$  ( $5756\text{ mol}^{-1}\text{dm}^3\text{cm}^{-1}$ ), 232 (30906).

**Deformylflustrabromine (1).** To a solution of flustrabromine (**6**, 1.59 g, 5.0 mmol) in EtOH (400 ml) was added NaOH (32%, 15.3 ml). The reaction mixture was refluxed for 24 h, cooled to rt, and concentrated in vacuo to a volume of 50 ml. It was diluted with Et<sub>2</sub>O (500 ml), washed four times with H<sub>2</sub>O (100 ml), dried over Na<sub>2</sub>SO<sub>4</sub>, and filtered. The solvent was removed under reduced pressure affording **1** as a yellowish semi-crystalline oil (1.53 g, 4.8 mmol, 96%) which could be recrystallized from *iso*-hexane.  $R_f$  (silica, CHCl<sub>3</sub>/MeOH (4:1)) = 0.4. <sup>1</sup>H NMR (400 MHz, CD<sub>3</sub>OD):  $\delta = 7.47$  (d, <sup>4</sup> $J = 1.6\text{ Hz}$ , 1 H, 7-H), 7.31 (d, <sup>3</sup> $J = 8.4\text{ Hz}$ , 1 H, 4-H), 7.03 (dd, <sup>3</sup> $J = 8.4\text{ Hz}$ , <sup>4</sup> $J = 1.6\text{ Hz}$ , 1 H, 5-H), 6.06 (dd, <sup>3</sup> $J = 17.3, 10.6\text{ Hz}$ , 1 H, 2''-H), 5.04 (dd, <sup>3</sup> $J = 17.3\text{ Hz}$ , <sup>2</sup> $J = 1.1\text{ Hz}$ , 1 H, 3''-H<sub>E</sub>), 5.02 (dd, <sup>3</sup> $J = 10.6\text{ Hz}$ , <sup>2</sup> $J = 1.1\text{ Hz}$ , 1 H, 3''-H<sub>Z</sub>), 4.88 (s, 1 H, NH), 2.90 (m, 2H, 1'-H), 2.65 (m, 2H, 2'-H), 2.31 (s, 3H, NCH<sub>3</sub>), 1.46 (s, 6H, 4''-H, 5''-H). <sup>13</sup>C NMR (400 MHz, CD<sub>3</sub>OD):  $\delta = 146.8$  (C-2''), 141.2 (C-2), 136.2 (C-7a), 128.7 (C-3a), 121.6 (C-5), 118.6 (C-4), 114.0 (C-6), 113.6 (C-7), 110.9 (C-3''), 108.2 (C-3), 52.5 (C-2'), 48.3 (CH<sub>3</sub>), 39.1 (C-1''), 27.4 (C-4'', C-5''), 24.8 (C-1'). <sup>1</sup>H, <sup>15</sup>N-HMBC (600 MHz, CDCl<sub>3</sub>):  $\delta = 127$  (indole-NH), 30 (side chain NH). MS (EI, 70 eV):  $m/z$  (%) = 320/322 (1/1) [ $\text{M}^+$ ], 277/279 (26/26), 261/263 (13/8) [ $\text{C}_{13}\text{H}_{14}\text{BrN}^+$ ], 194/196 (1/2) [ $\text{C}_8\text{H}_6\text{BrN}^+$ ], 167 (16). HRMS (EI): calcd. 320.0888 ( $\text{C}_{16}\text{H}_{21}^{79}\text{BrN}_2$ ,  $[\text{M}^+]$ ); found 320.0881. IR (KBr):  $\tilde{\nu} = 3447\text{ cm}^{-1}$ , 3247, 3082, 2969, 2929, 2873, 2800, 2447, 1634, 1612, 1566, 1463, 1413, 1382, 1363, 1336, 1306, 1286, 1217, 1182, 1142, 1100, 1051, 1008, 910, 852, 801, 756, 666, 592. UV/Vis ( $\text{CH}_3\text{CN}$ ):  $\lambda_{\text{max}} (\epsilon) = 297\text{ nm}$  ( $3989\text{ mol}^{-1}\text{dm}^3\text{cm}^{-1}$ ), 289 (4240), 232 (21827).

**Flustramine C (2).** To a solution of **1** (100 mg, 0.31 mmol) in THF (5 ml) was added NBS (55 mg, 0.31 mmol). The reaction mixture was stirred at rt for 2 h and diluted in diethyl ether (50 ml). The organic layer was washed with 2 N NaOH (10 ml) and twice with water (10 ml),

dried over Na<sub>2</sub>SO<sub>4</sub>, filtered and concentrated in vacuo. The residual oil was purified by column chromatography (silica, EtOAc) affording **2** (90 mg, 0.28 mmol, 90%) as a colorless oil. <sup>1</sup>H NMR (300 MHz, CDCl<sub>3</sub>): δ = 7.19 (dd, <sup>3</sup>J = 1.1 Hz, <sup>4</sup>J = 1.1 Hz, 1 H, 7-H), 6.89 (d, <sup>3</sup>J = 1.1 Hz, 2H, 5-H, 4-H), 5.99 (dd, <sup>3</sup>J = 17.3, 10.8 Hz, 1 H, 12-H), 5.05 (dd, <sup>3</sup>J = 10.8 Hz, <sup>2</sup>J = 1.2 Hz, 1 H, 13-H<sub>Z</sub>), 5.03 (dd, <sup>3</sup>J = 17.3 Hz, <sup>2</sup>J = 1.2 Hz, 1 H, 13-H<sub>E</sub>), 3.93 (ddd, <sup>2</sup>J = 10.1 Hz, <sup>3</sup>J = 8.8, 6.5 Hz, 1 H, 2-H<sub>a</sub>), 3.38 (ddd, <sup>2</sup>J = 10.1 Hz, <sup>3</sup>J = 10.1, 0.9 Hz, 1 H, 2-H<sub>b</sub>), 3.00 (s, 3H, NCH<sub>3</sub>), 2.32 (ddd, <sup>2</sup>J = 13.0 Hz, <sup>3</sup>J = 6.5, 0.9 Hz, 1 H, 3-H<sub>a</sub>), 2.05 (ddd, <sup>2</sup>J = 13.0, 10.1 Hz, <sup>3</sup>J = 8.8 Hz, 1 H, 3-H<sub>b</sub>), 0.98 (s, 3H, 10-H), 0.87 (s, 3H, 11-H). <sup>13</sup>C NMR (75 MHz, CDCl<sub>3</sub>): δ = 188.1 (C-8a), 163.5 (C-7a), 143.4 (C-12), 137.6 (C-3b), 124.2 (C-4), 122.0 (C-6), 121.9 (C-5), 119.1 (C-7), 113.5 (C-13), 65.8 (C-3a), 59.7 (C-2), 42.9 (C-9), 33.1 (NCH<sub>3</sub>), 27.9 (C-3), 22.8 (C-10), 21.6 (C-11). <sup>1</sup>H, <sup>15</sup>N-HMBC (400 MHz, CDCl<sub>3</sub>): δ = 217 (imine-N), 90 (NMe). MS (EI, 70 eV): *m/z* (%) = 320/318 (24/29) [M<sup>+</sup>], 251/249 (100/97) [C<sub>11</sub>H<sub>10</sub>N<sub>2</sub>Br<sup>+</sup>], 170 (49) [C<sub>11</sub>H<sub>10</sub>N<sub>2</sub><sup>+</sup>], 129 (21). FTHRMS (ESI<sup>+</sup>): calcd. 319.0810 (C<sub>16</sub>H<sub>20</sub>N<sub>2</sub><sup>79</sup>Br, [M<sup>+</sup>+H]); found 319.0798. IR:  $\tilde{\nu}$  = 2917 cm<sup>-1</sup>, 1632 (s), 1582 (s), 1560 (s), 1452 (m), 1412 (m), 1394 (m), 1364 (w), 1300 (m), 1212 (w), 1153 (w), 1115 (w), 1056 (w), 1003 (w), 916 (w), 898 (w), 864 (m), 802 (w), 730 (w). UV/Vis (CH<sub>3</sub>OH): λ<sub>max</sub> (ε) = 290 nm (7208 mol<sup>-1</sup>dm<sup>3</sup>cm<sup>-1</sup>), 232 (23412).

**Reaction of deformylflustrabromine with 1 equiv. of *t*BuOCl.** To a solution of **1** (100 mg, 0.31 mmol) in dry THF (2.5 ml) and triethylamine (52 μl, 0.37 mmol) was added *t*-BuOCl (35 μl, 0.31 mmol) at -78 °C. The reaction mixture was stirred at -78 °C for 30 min and was allowed to warm slowly to rt. It was diluted in Et<sub>2</sub>O (50 ml). The organic layer was washed three times with water (10 ml), dried over Na<sub>2</sub>SO<sub>4</sub>, filtered and concentrated in vacuo, affording a 4:1 mixture of monochlorinated intermediate **7** and dichlorinated intermediate **11** as colorless oil. Data of *N*-chlorodeformylflustrabromine (**7**): <sup>1</sup>H NMR (600 MHz, CDCl<sub>3</sub>): δ = 7.92 (br. s, 1 H, NH), 7.43 (d, <sup>5</sup>J = 1.8 Hz, 1 H, 7-H), 7.40 (dd, <sup>3</sup>J = 8.4 Hz, <sup>5</sup>J = 1.8 Hz, 1

H, 4-H), 7.18 (d,  $^3J = 8.4$  Hz, 1 H, 5-H), 6.09 (dd,  $^3J = 18.0$ , 10.4 Hz, 1 H, 2''-H), 5.17 (dd,  $^3J = 10.4$  Hz,  $^2J = 1.2$  Hz, 1 H, 3''-H<sub>Z</sub>), 5.16 (dd,  $^3J = 18.0$  Hz,  $^2J = 1.2$  Hz, 1 H, 3''-H<sub>E</sub>), 3.17 (m, 2H, 1'-H<sub>2</sub>), 3.08 (m, 2H, 2'-H<sub>2</sub>), 2.99 (s, 3H, NCH<sub>3</sub>), 1.54 (s, 6H, 2 CCH<sub>3</sub>). <sup>13</sup>C NMR (75 MHz, CDCl<sub>3</sub>):  $\delta = 145.4$  (C2''), 140.5 (C2), 134.9 (C7a), 128.5 (C3a), 122.5 (C5), 119.3 (C4), 114.8 (C6), 113.4 (C7), 112.4 (C3''), 107.8 (C3), 66.4 (C2'), 53.1 (NCH<sub>3</sub>), 38.9 (C1''), 27.6 (2 CH<sub>3</sub>), 23.8 (C1'). <sup>1</sup>H, <sup>15</sup>N-HMBC (600 MHz, CDCl<sub>3</sub>):  $\delta = 127$  (indole-NH), 105 (side chain N-Cl). FTHRMS (ESI<sup>-</sup>): calcd. 389.0187 (C<sub>16</sub>H<sub>20</sub><sup>79</sup>Br<sup>35</sup>Cl<sub>2</sub>N<sub>2</sub>, [M+Cl<sup>-</sup>]); found 389.0206. The mixture was stored in CDCl<sub>3</sub> (2.5 ml) at rt for 12 h. The solution was concentrated in vacuo and diluted with Et<sub>2</sub>O (50 ml). The organic layer was washed with aqueous NaOH (2 M, 5 ml), three times with water (10 ml), dried over Na<sub>2</sub>SO<sub>4</sub>, filtered and concentrated in vacuo, affording flustramine C (**2**, 53 mg, 0.17 mmol, 60%) as a colorless oil. For data of **2** and **11**, see there.

**Reaction of deformylflustrabromine with 2 equiv. of *t*BuOCl.** To a solution of **1** (550 mg, 1.71 mmol) in dry THF (14 ml) and triethylamine (0.52 ml, 3.77 mmol) was added *t*-BuOCl (0.38 ml, 3.42 mmol) at -78 °C. The reaction mixture was stirred at -78 °C for 30 min and was allowed to warm to rt. It was diluted in Et<sub>2</sub>O (150 ml). The organic layer was washed three times with water (30 ml), dried over Na<sub>2</sub>SO<sub>4</sub>, filtered and concentrated in vacuo, affording chloroindolenine **11** as colorless oil (630 mg, 94 %) which was purified by chromatography (silica gel, petrol ether/EtOAc (15:1)). Data of chloroindolenine **11**: <sup>1</sup>H NMR (600 MHz, CDCl<sub>3</sub>):  $\delta = 7.66$  (d,  $^4J = 1.7$  Hz, 1 H, 7-H), 7.38 (dd,  $^3J = 7.9$  Hz,  $^4J = 1.7$  Hz, 1 H, 5-H), 7.21 (d,  $^3J = 7.9$  Hz, 1 H, 4-H), 6.37 (dd,  $^3J = 17.4$ , 10.6 Hz, 1 H, 2''-H), 5.26 (dd,  $^3J = 17.4$  Hz,  $^2J = 0.7$  Hz, 1 H, 3''-H<sub>E</sub>), 5.19 (dd,  $^3J = 10.6$  Hz,  $^2J = 0.7$  Hz, 1 H, 3''-H<sub>Z</sub>), 2.83 (ddd,  $^2J = 13.4$  Hz,  $^3J = 10.4$ , 5.1 Hz, 1 H, 1'-H<sub>a</sub>), 2.74 (s, 3H, NCH<sub>3</sub>), 2.67 (ddd,  $^2J = 13.4$  Hz,  $^3J = 10.4$ , 4.5 Hz, 1 H, 1'-H<sub>b</sub>), 2.30 (ddd,  $^2J = 12.9$  Hz,  $^3J = 10.4$ , 5.1 Hz, 1 H, 2'-H<sub>a</sub>), 2.24 (ddd,  $^2J = 12.9$  Hz,  $^3J = 10.4$ , 4.5 Hz, 1 H, 2'-H<sub>b</sub>), 1.62 (s, 3H, CH<sub>3</sub>), 1.59 (s, 3H, CH<sub>3</sub>). <sup>13</sup>C NMR (100 MHz,

CDCl<sub>3</sub>):  $\delta$  = 188.2 (C2), 152.8 (C7a), 143.5 (C2''), 138.5 (C3a), 129.7 (C5), 124.3 (C7), 123.5 (C6), 123.2 (C4), 113.6 (C3''), 71.9 (C3), 60.5 (C2'), 53.1 (NCH<sub>3</sub>), 43.7 (C1''), 37.7 (C1'), 28.1 (CCH<sub>3</sub>), 27.2 (CCH<sub>3</sub>). <sup>1</sup>H, <sup>15</sup>N-HMBC (600 MHz, CDCl<sub>3</sub>):  $\delta$  = 322 (indolenine-N), 101 (side chain N-Cl). FTHRMS (ESI+): calcd. 389.0187 (C<sub>16</sub>H<sub>20</sub><sup>79</sup>Br<sup>35</sup>Cl<sub>2</sub>N<sub>2</sub>, [M+H<sup>+</sup>]), found 389.0199. Chloroindolenine **11** (340 mg, 0.87 mmol) was heated in CHCl<sub>3</sub> (10 ml) at 55 °C for 17 h. The solution was concentrated in vacuo and diluted with Et<sub>2</sub>O (50 ml). The organic layer was washed with aqueous NaOH (2 M, 25 ml), three times with water (10 ml), dried over Na<sub>2</sub>SO<sub>4</sub>, filtered and concentrated in vacuo. Column chromatography (silica gel, EtOAc) afforded flustramine C (**2**, 69 mg, 25%) and 5-chloroflustramine C (**13**, 92 mg, 30%) as colorless oils. Data of 5-chloroflustramine C (**13**): <sup>1</sup>H NMR (400 MHz, CDCl<sub>3</sub>):  $\delta$  = 7.27 (s, 1 H, 7-H), 7.10 (s, 1 H, 4-H), 5.96 (dd, <sup>3</sup>J = 17.4, 10.8 Hz, 1 H, 12-H), 5.08 (dd, <sup>3</sup>J = 10.8 Hz, <sup>2</sup>J = 1.1 Hz, 1 H, 13-H<sub>Z</sub>), 5.04 (dd, <sup>3</sup>J = 17.4 Hz, <sup>2</sup>J = 1.1 Hz, 1 H, 13-H<sub>E</sub>), 3.94 (ddd, <sup>2</sup>J = 10.1 Hz, <sup>3</sup>J = 8.8, 6.5 Hz, 1 H, 2-H<sub>a</sub>), 3.39 (ddd, <sup>2</sup>J = 10.1 Hz, <sup>3</sup>J = 10.1, 0.9 Hz, 1 H, 2-H<sub>b</sub>), 3.00 (s, 3H, NCH<sub>3</sub>), 2.34 (ddd, <sup>2</sup>J = 13.1 Hz, <sup>3</sup>J = 6.5, 0.9 Hz, 1 H, 3-H<sub>a</sub>), 2.06 (ddd, <sup>2</sup>J = 13.1 Hz, <sup>3</sup>J = 10.1, 8.8 Hz, 1 H, 3-H<sub>b</sub>), 0.98 (s, 3H, 10-H), 0.89 (s, 3H, 11-H). <sup>13</sup>C NMR (100 MHz, CDCl<sub>3</sub>):  $\delta$  = 187.9 (C8a), 161.8 (C7a), 142.9 (C12), 139.3 (C3b), 124.7 (C4), 124.1 (C5), 121.6 (C6), 120.2 (C7), 114.0 (C13), 66.2 (C3a), 59.7 (C2), 43.0 (C9), 33.1 (NCH<sub>3</sub>), 27.8 (C3), 22.8 (C11), 21.6 (C10). MS (EI, 70 eV): *m/z* (%) = 356/354/352 (7/28/22) [M<sup>+</sup>], 287/285/283 (27/50/100) [C<sub>11</sub>H<sub>10</sub>N<sub>2</sub>BrCl<sup>+</sup>], 204/206 (6/18) [C<sub>11</sub>H<sub>9</sub>N<sub>2</sub>Cl<sup>+</sup>], 169 (14) [C<sub>11</sub>H<sub>9</sub>N<sub>2</sub><sup>+</sup>]. HRMS (EI): calcd. 352.0342 (C<sub>16</sub>H<sub>19</sub>N<sub>2</sub><sup>79</sup>Br<sup>35</sup>Cl), found 352.0320.

Following pages: NMR and MS spectra of compounds **1**, **2**, **5**, **6**, **7**, **11**, **13**.



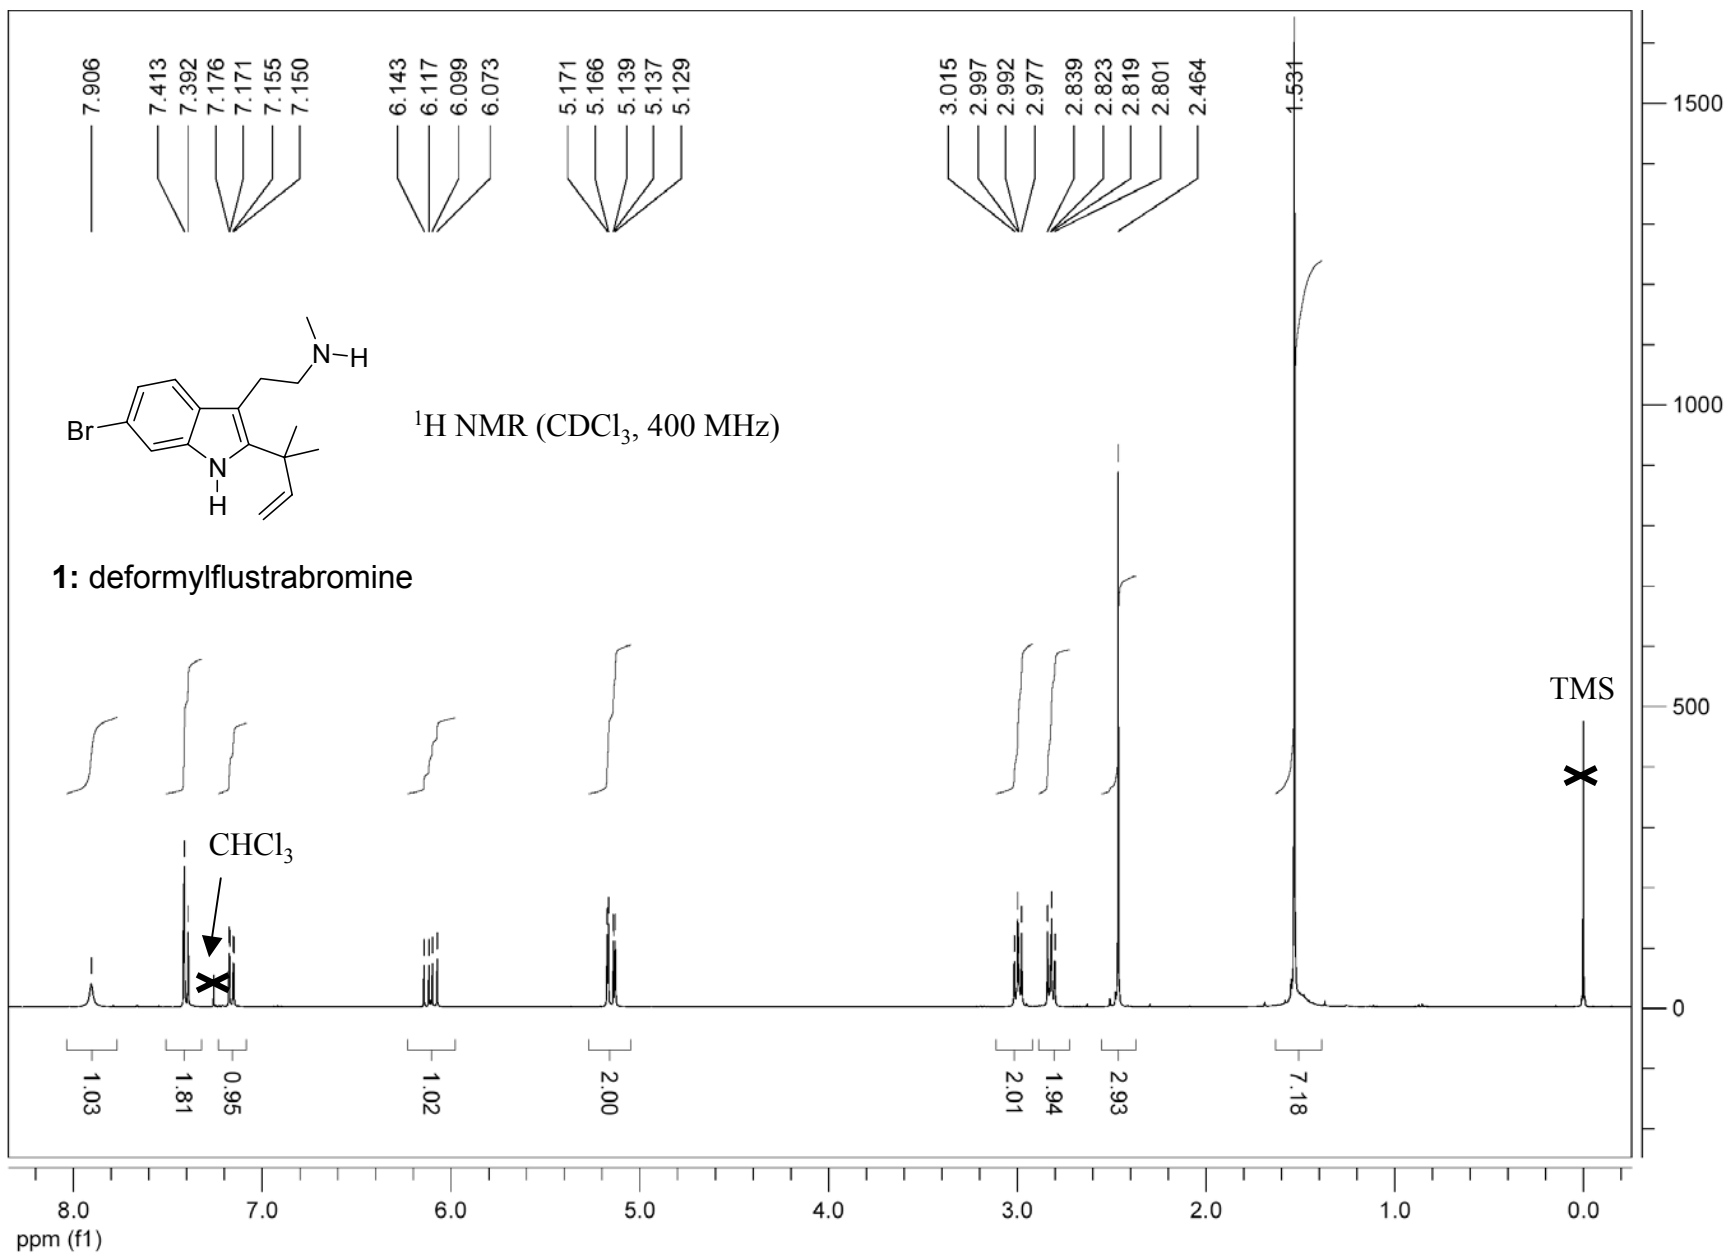

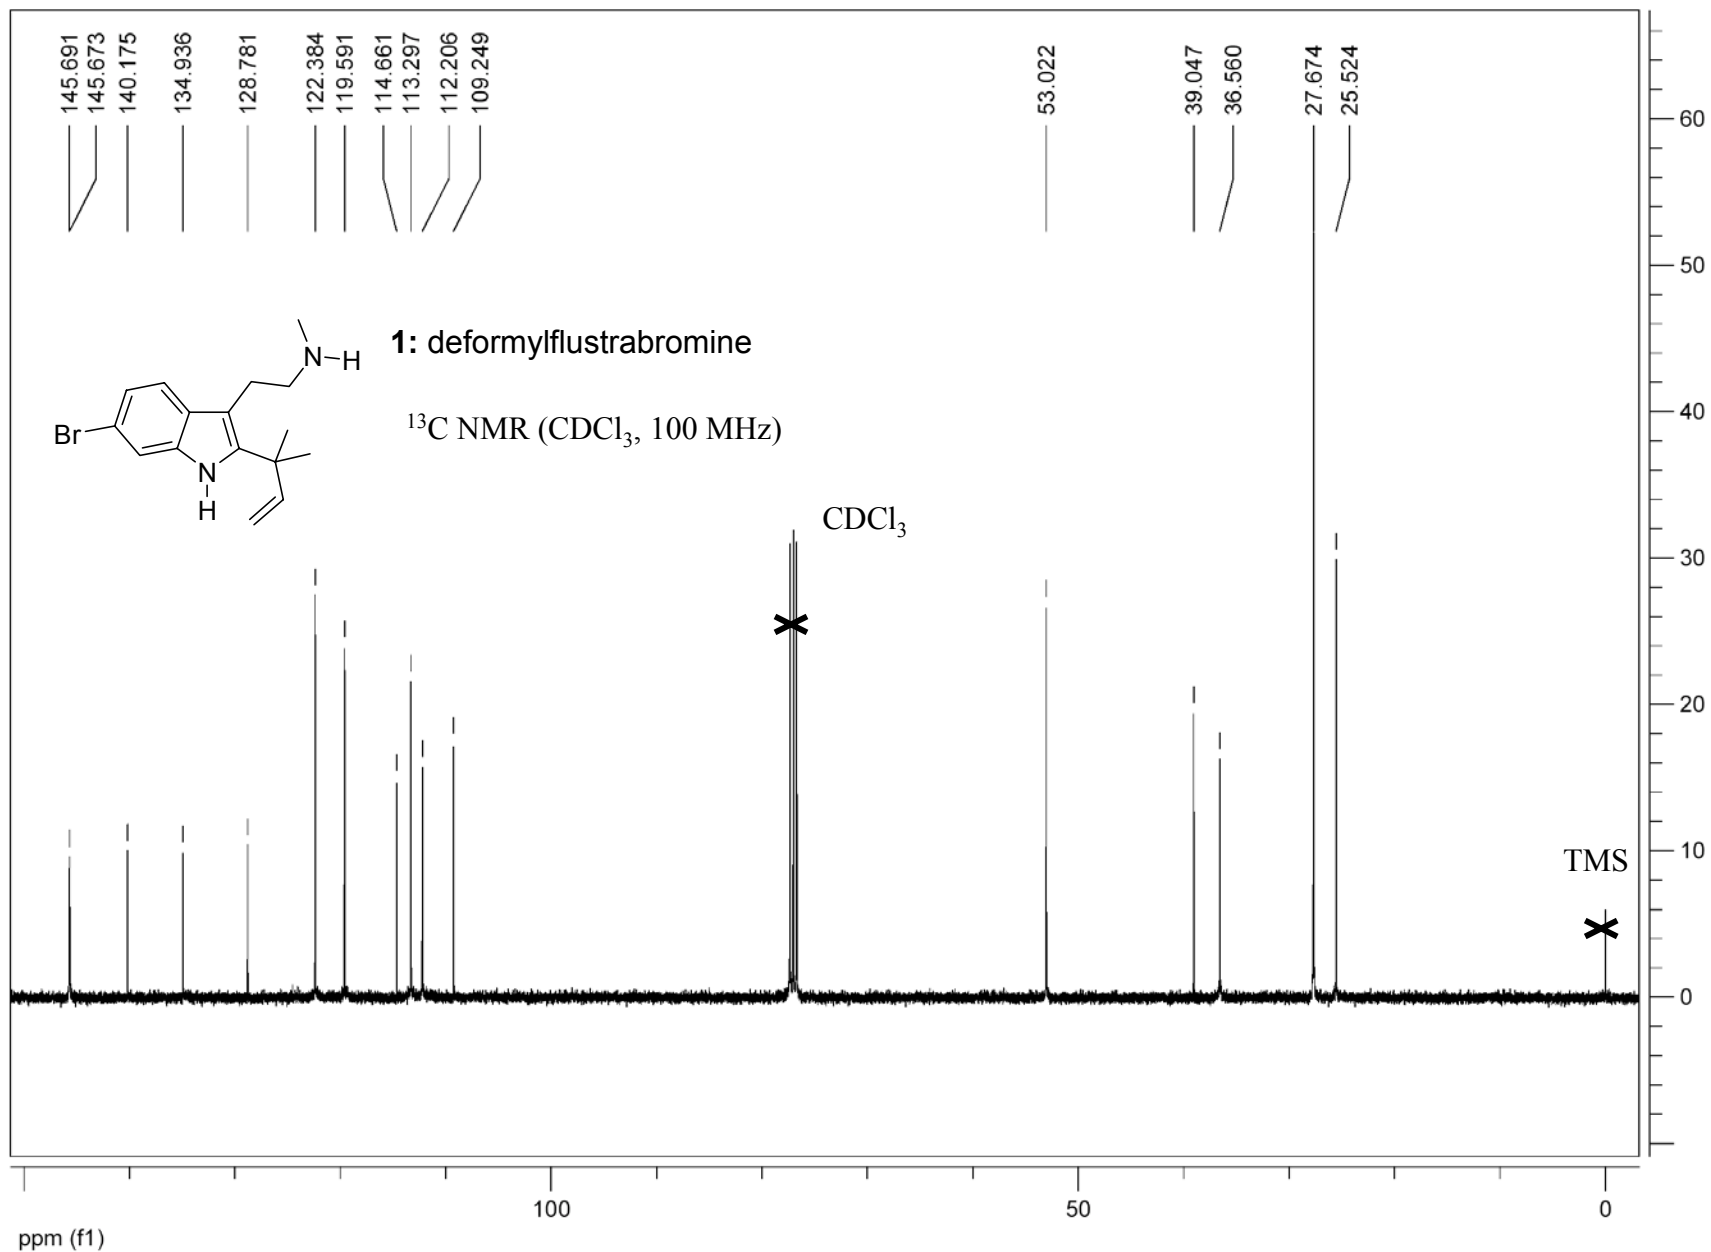

1632

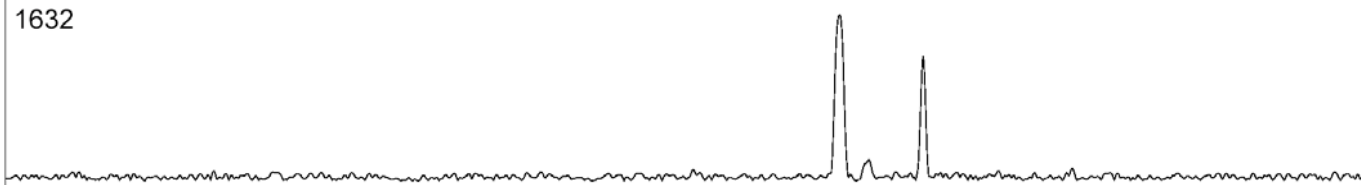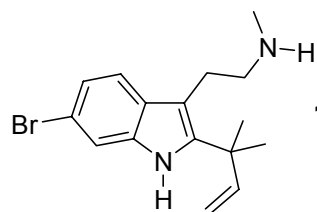**1: deformylflustrabromine** $^1\text{H}, ^{15}\text{N}$  HMBC ( $\text{CDCl}_3$ , 600 MHz)

7.418/126.9

8.02, 7.78/126.9 (HSQC)

2.809/30.1

2.994/30.1

2.465/30.1

1.532/126.9

8.0

7.0

6.0

5.0

4.0

3.0

2.0

1.0

0.0

ppm (f2)

ppm (f1)

HREIMS

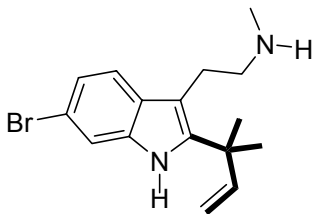

1: deformylflustrabromine

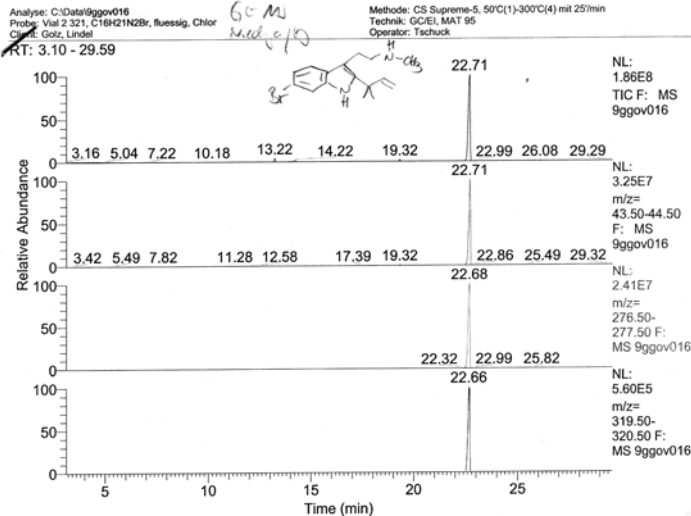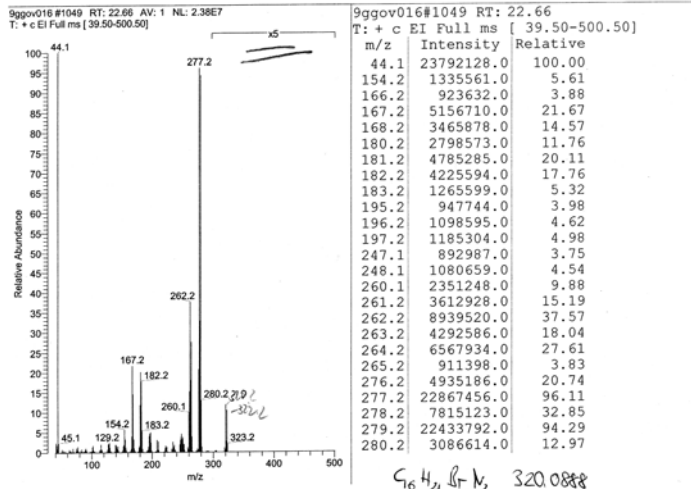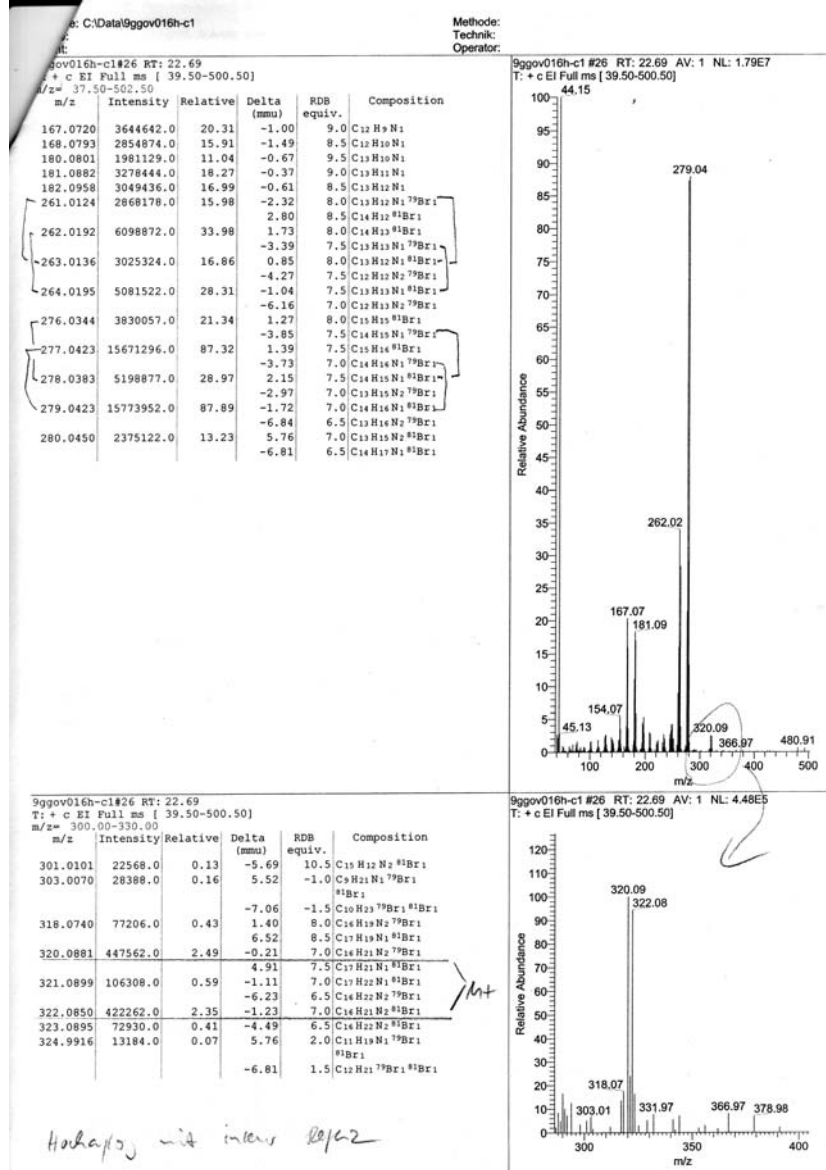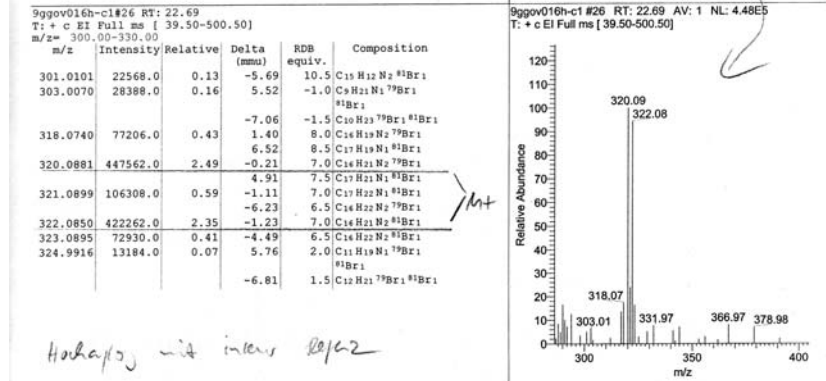

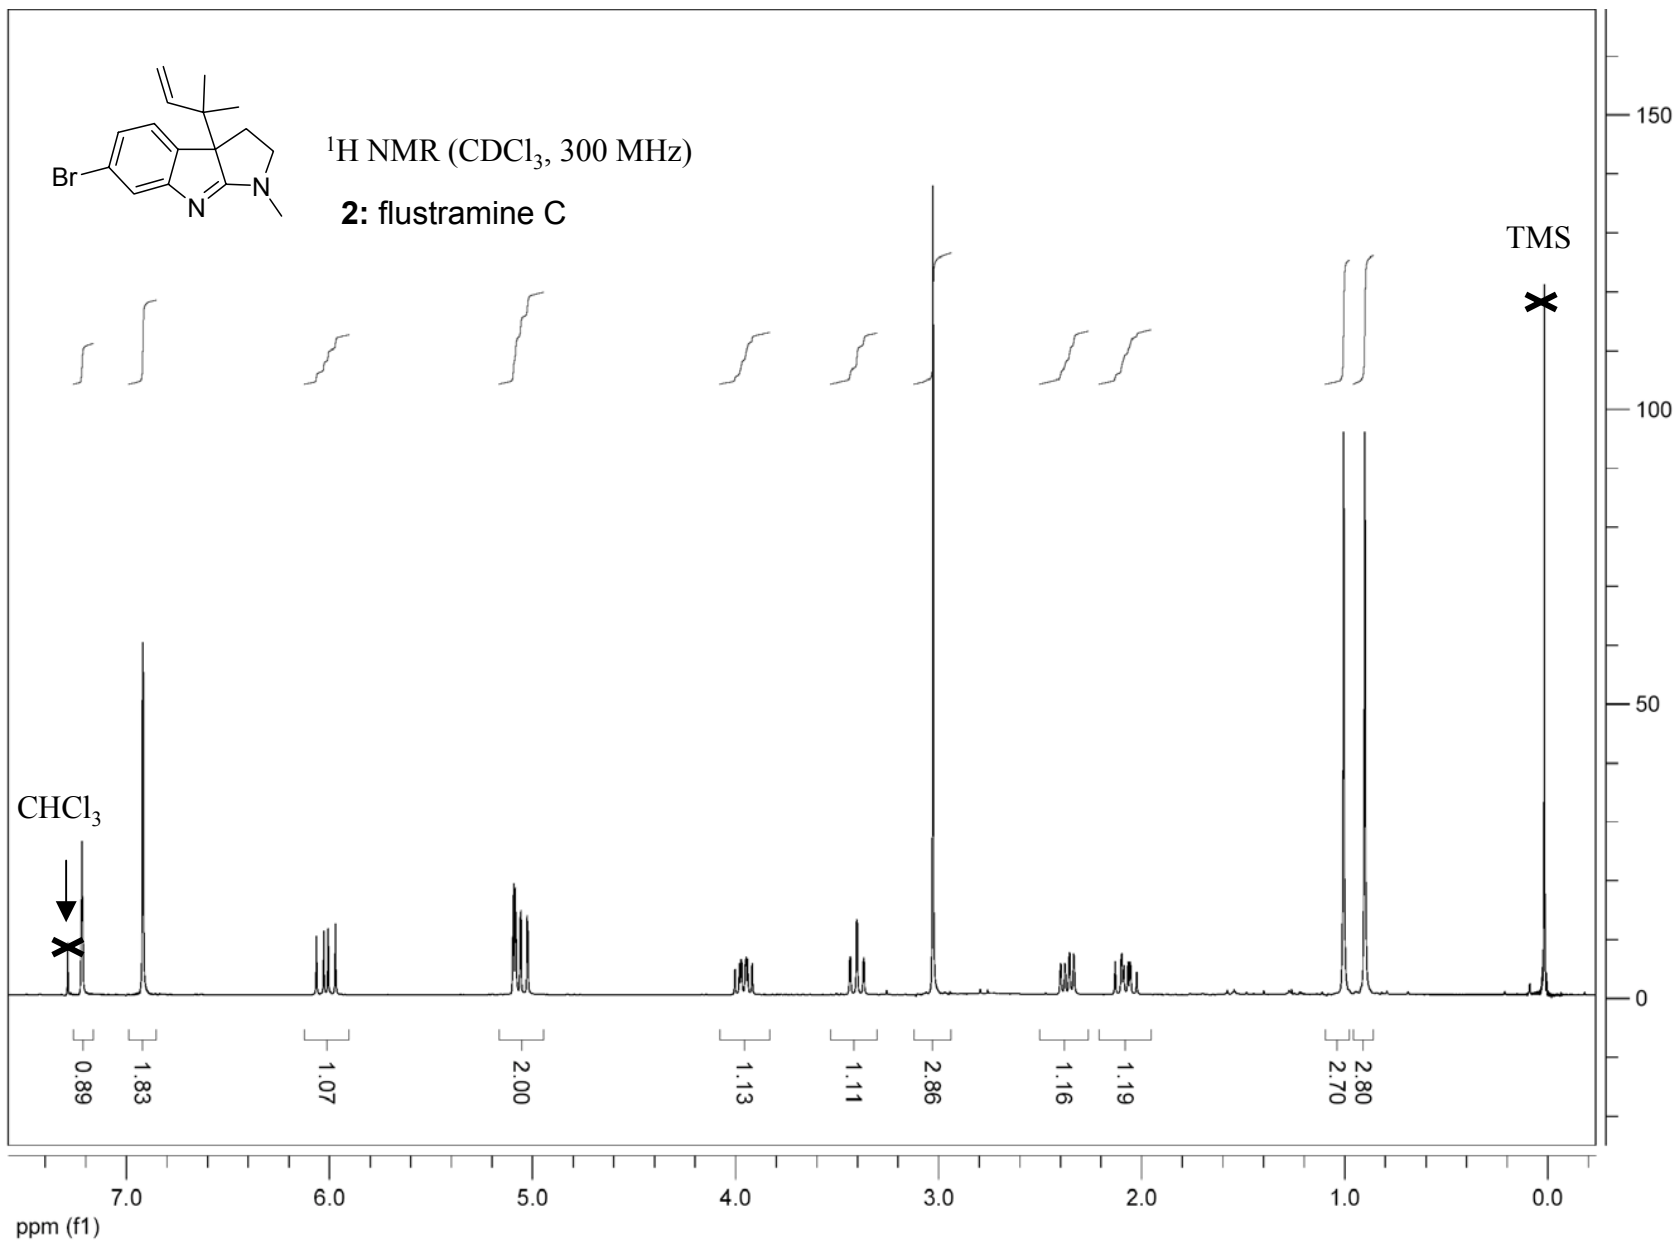

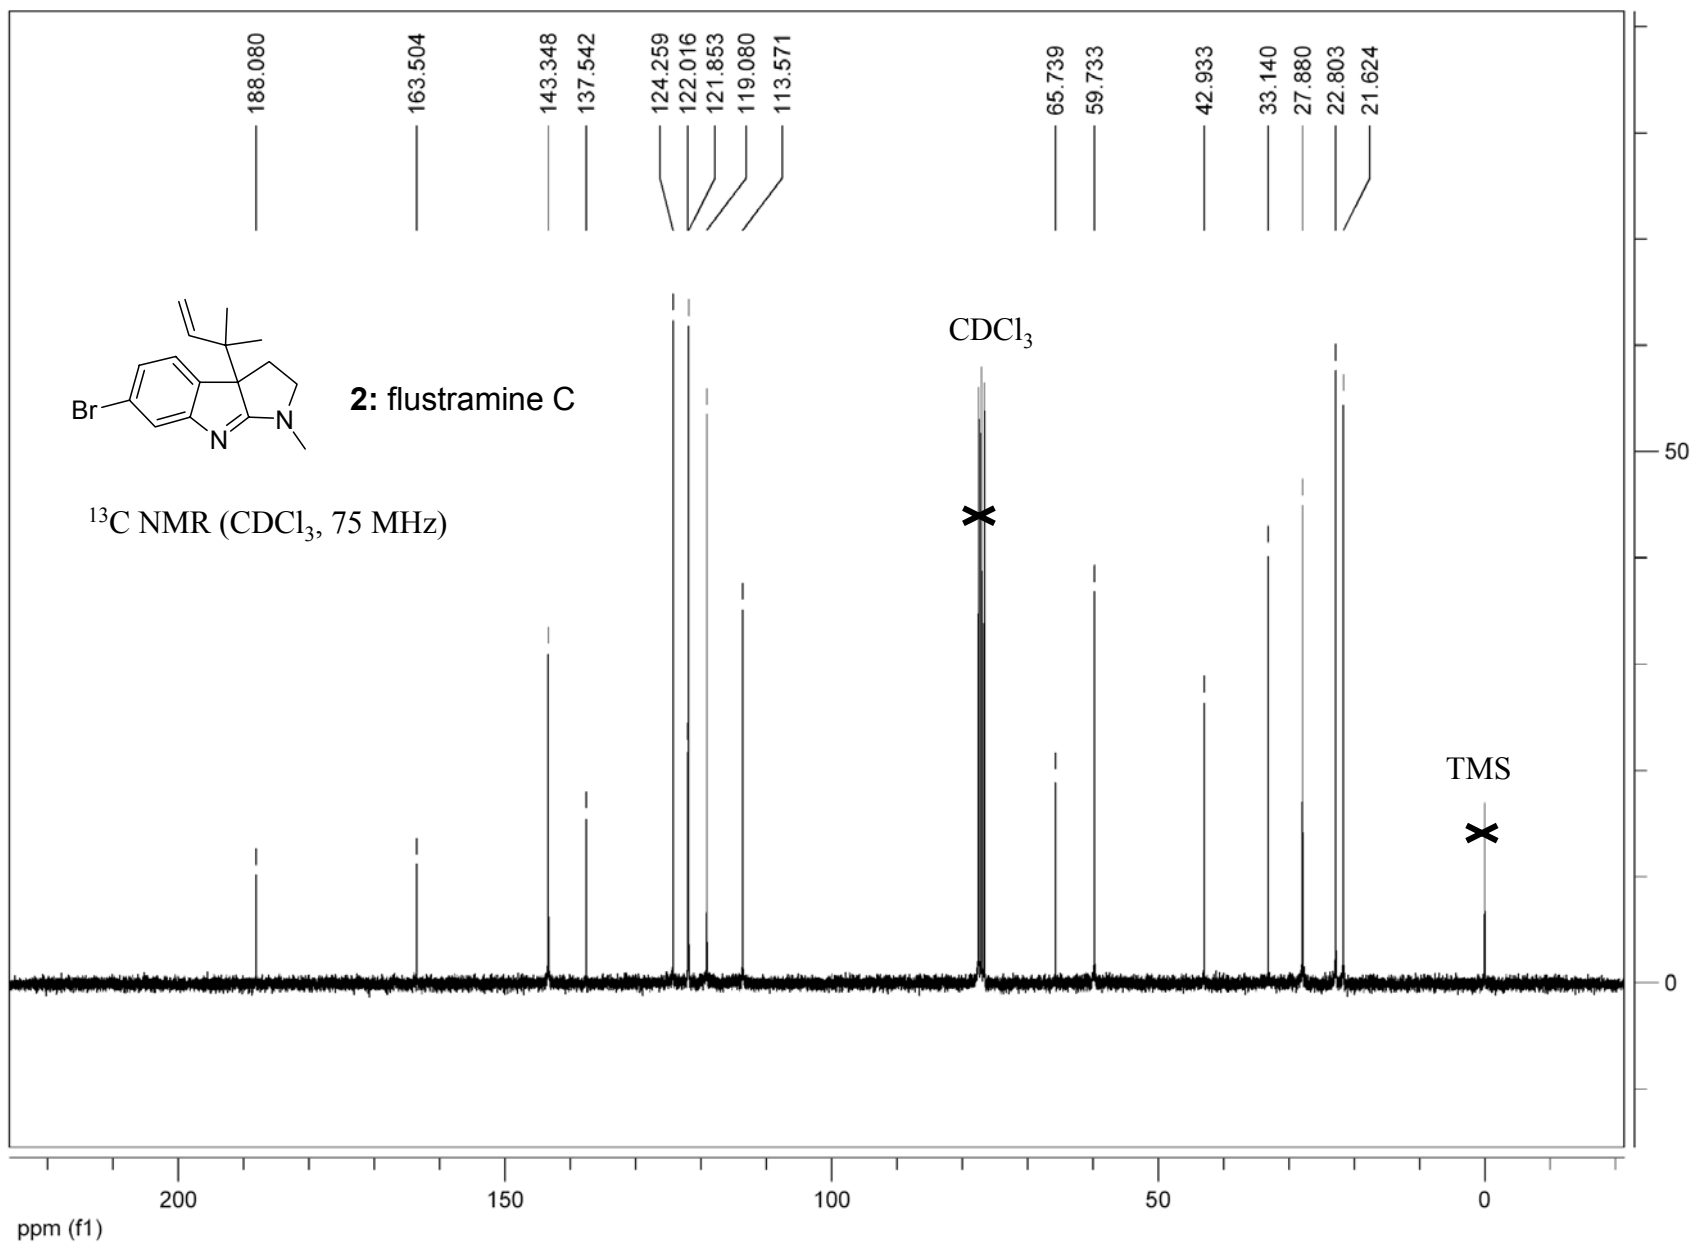

1425

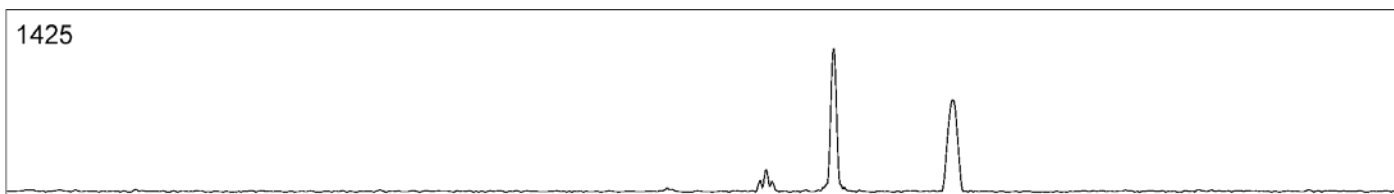

1086

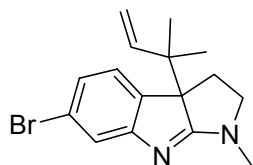**2: flustramine C** $^1\text{H}, ^{15}\text{N}$  HMBC ( $\text{CDCl}_3$ , 400 MHz)

3.012/90.4  
3.389/90.4  
2.346/90.4

7.200/217.4

ppm (f2)

7.0 6.0 5.0 4.0 3.0 2.0 1.0 0.0

ppm (f1)

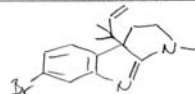

NL: 2.11E6  
 Total Scan PDA  
 8pbo176iii\_060801  
 34448

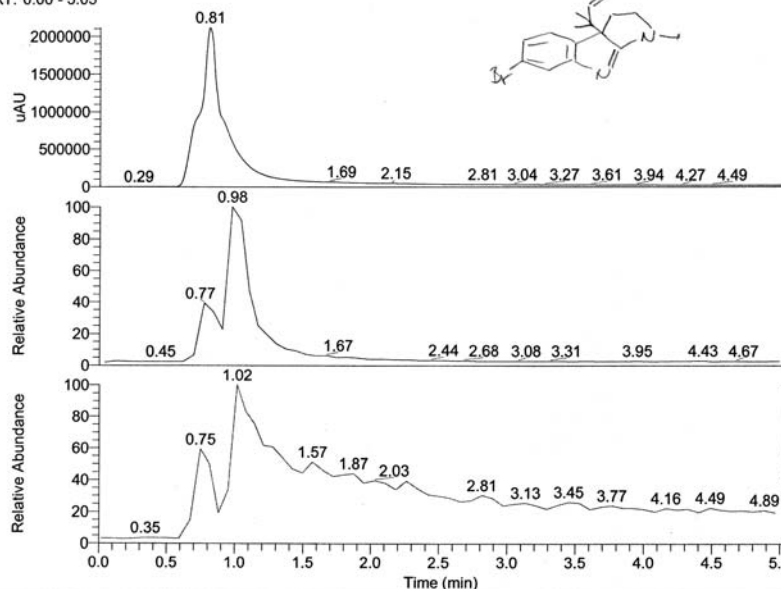

NL: 1.63E7  
 TIC F: FTMS - p  
 ESI Full ms [ 100.00-1000.00]  
 MS  
 8pbo176iii\_060801  
 34448

NL: 8.22E7  
 TIC F: FTMS + p  
 ESI Full ms [ 100.00-1000.00]  
 MS  
 8pbo176iii\_060801  
 34448

HRESIMS

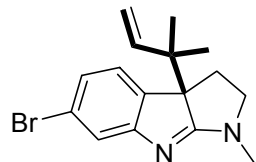

2: flustramine C

8pbo176iii\_060801134448 #51-173 RT: 0.75-2.11 AV: 20 NL: 5.78E7  
 F: FTMS + p ESI Full ms [ 100.00-1000.00]

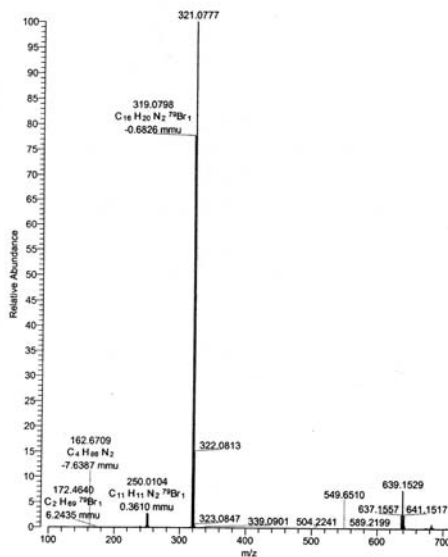

$C_{16}H_{20}BrN_2$ , 318.0732

8pbo176iii\_060801134448 #53-100 RT: 0.77-1.23 AV: 8 NL: 6.48E5  
 F: FTMS - p ESI Full ms [ 100.00-1000.00]

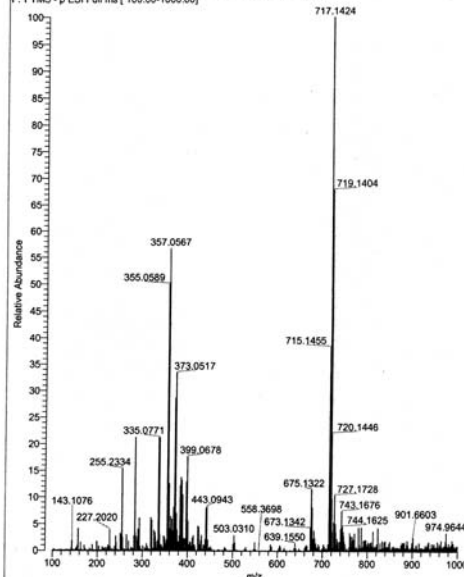



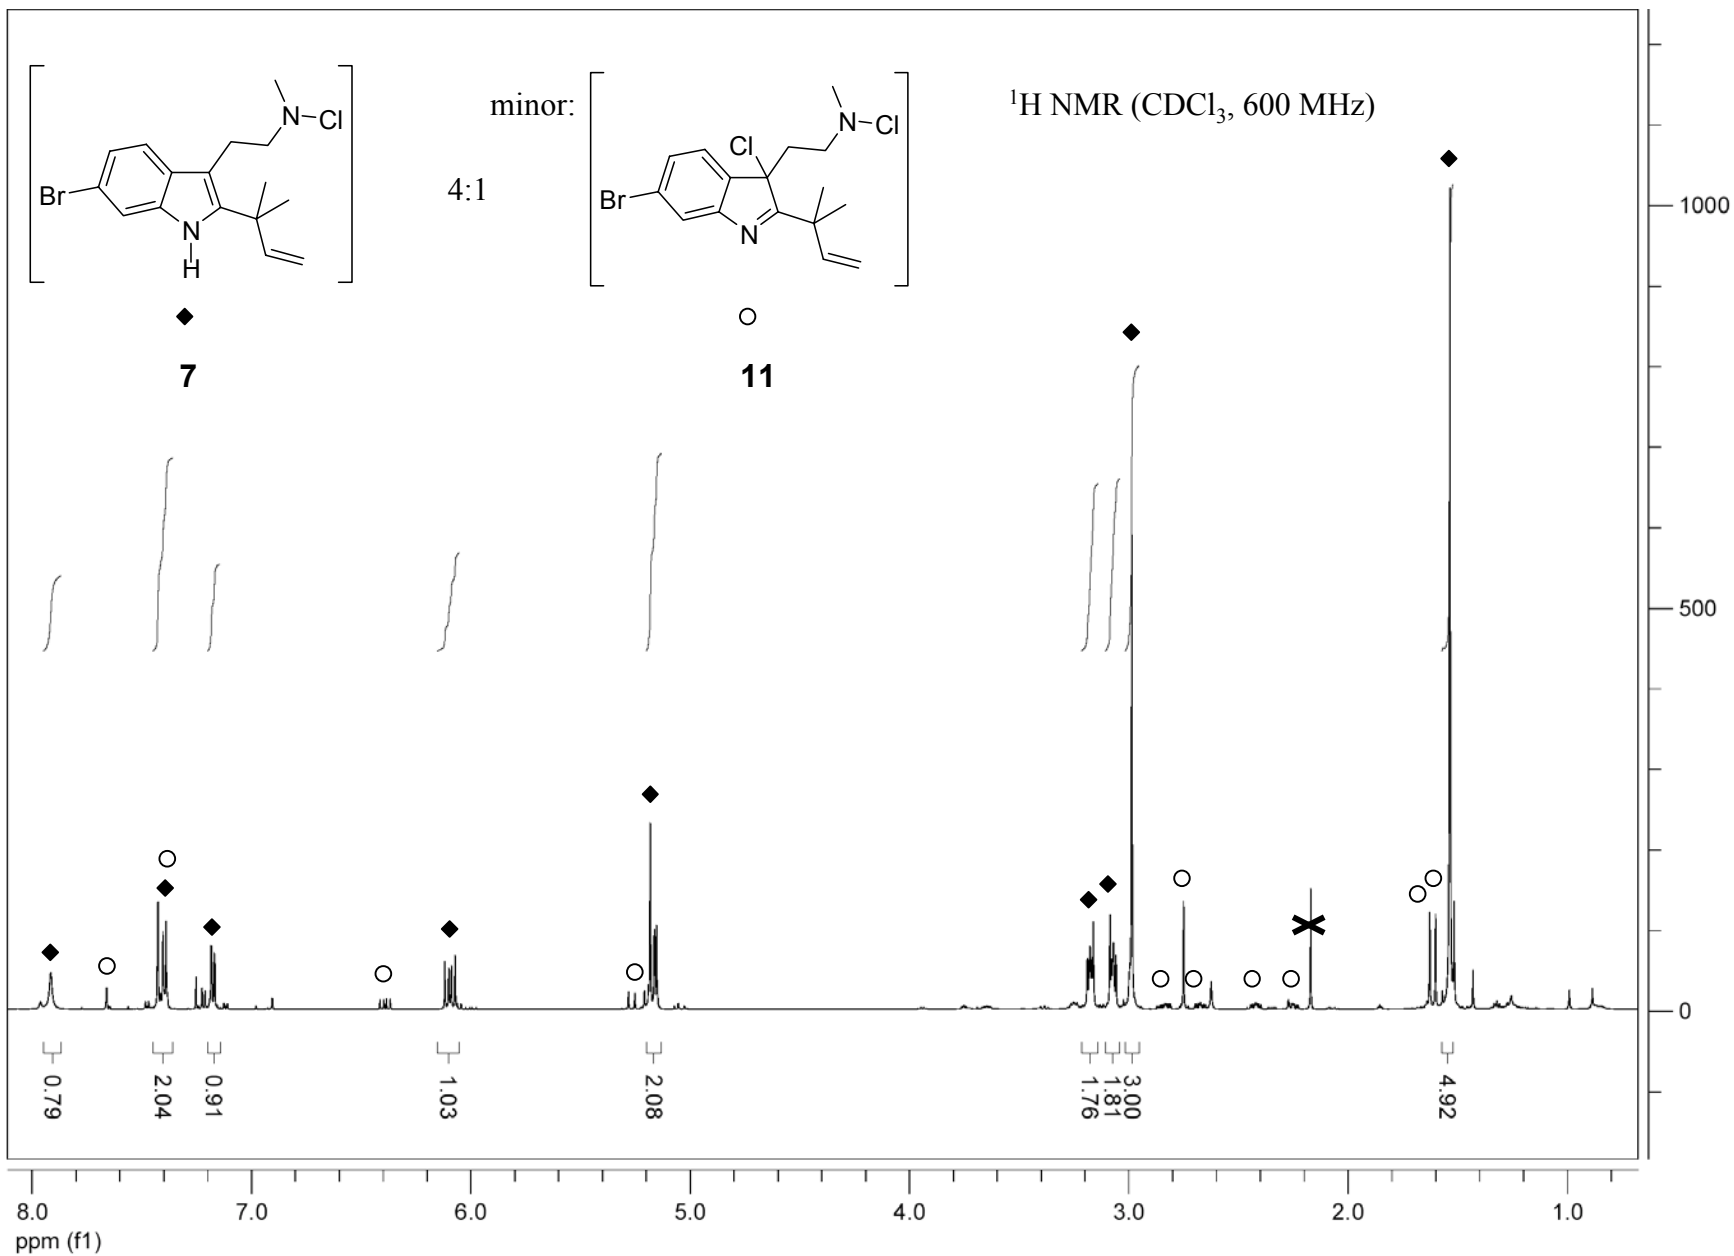

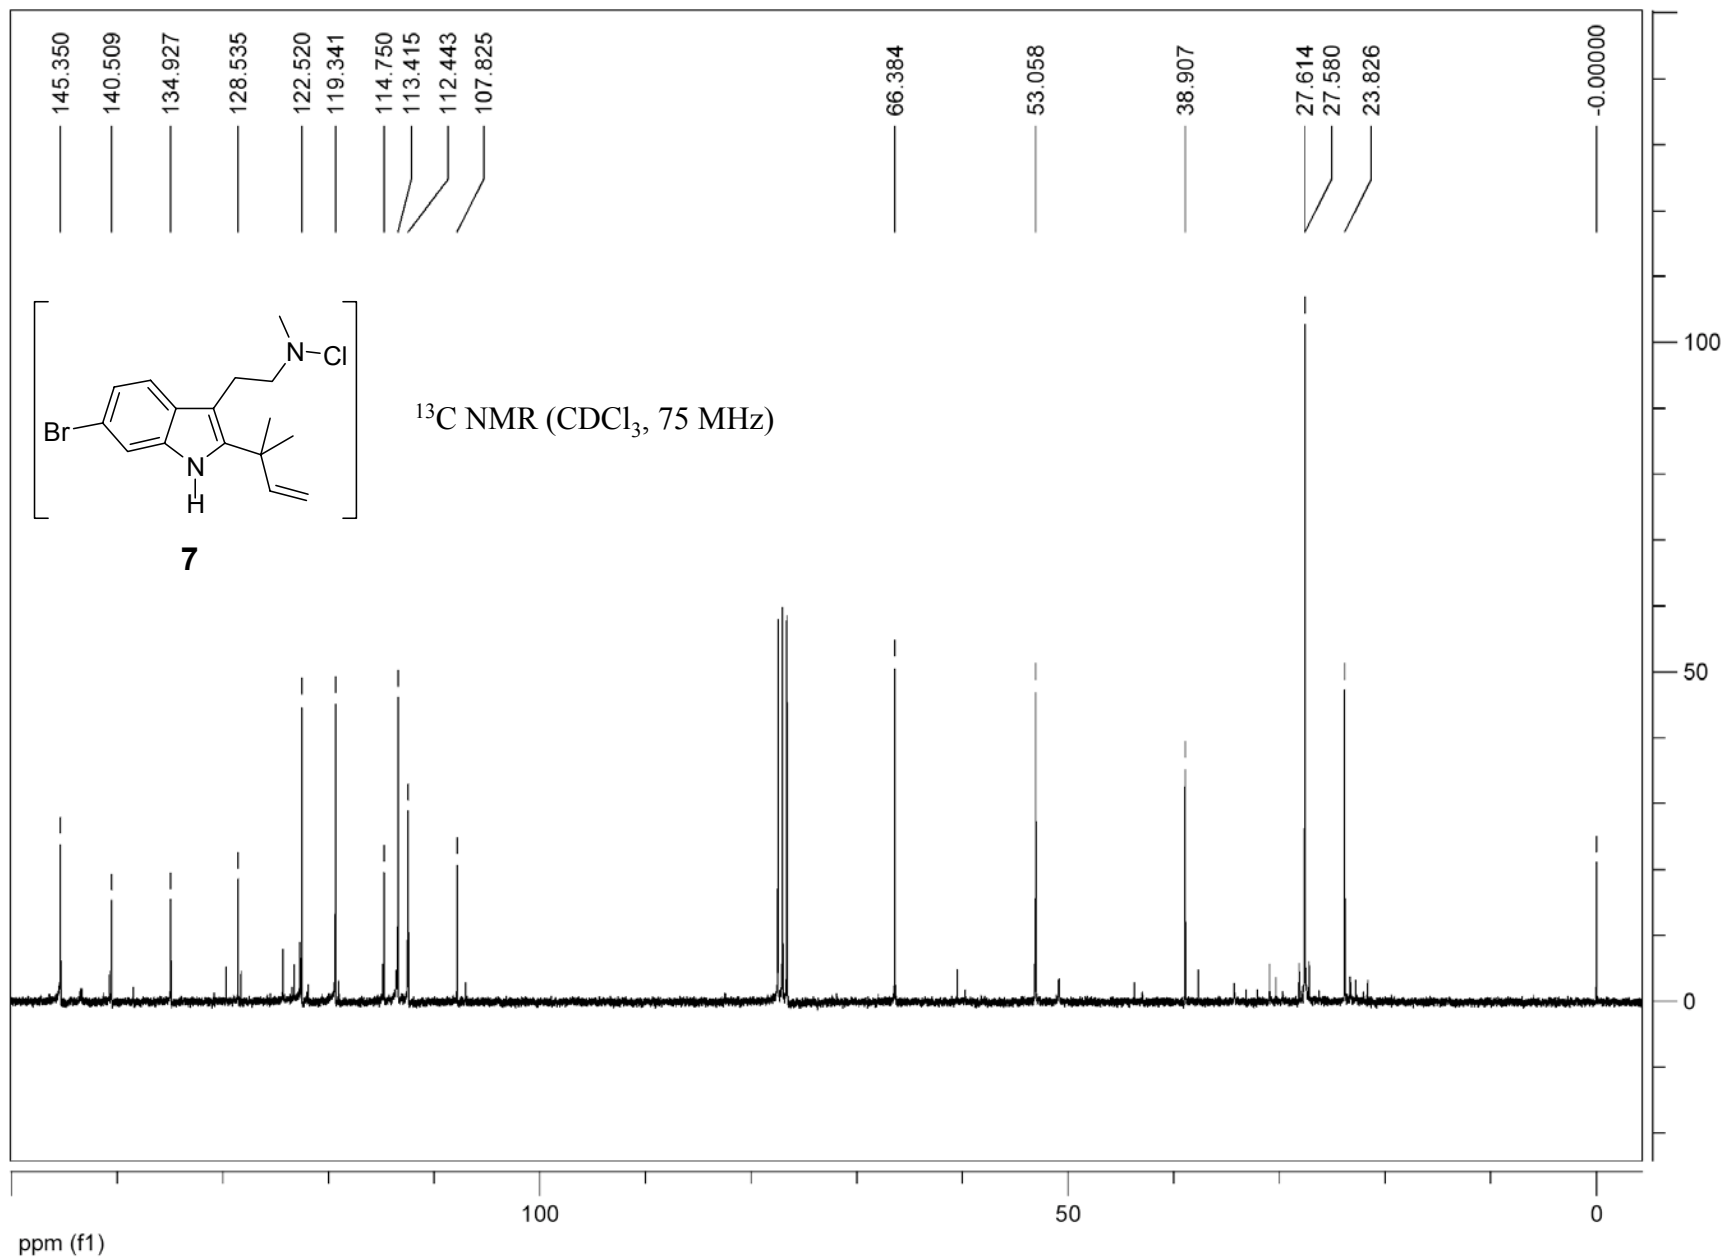

988

1214

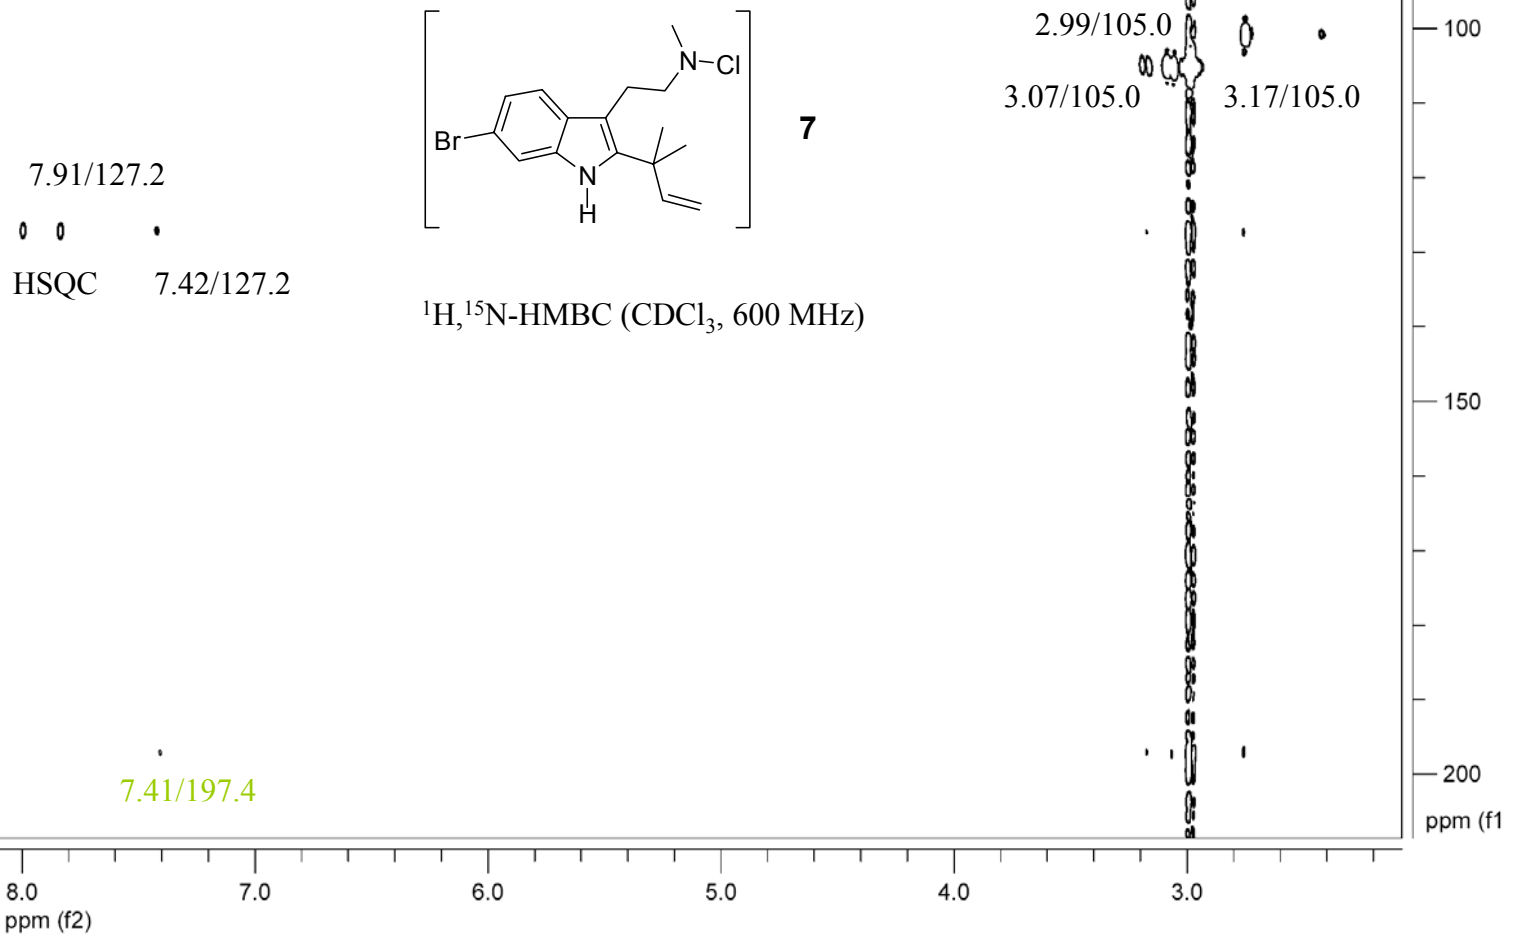

# HRESIMS

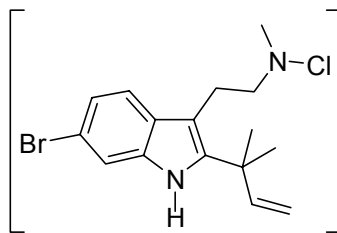

7

Probenbezeichnung: C:\Data\7pbo171iii  
Auftraggeber: Boehringer, Lindel  
RT: 0.00 - 5.02

Probe: 355, c16h20brcln2, gelöst, Chloroform  
Methode: FIA/ESI, SpHl

Inj Vol: 5.000000  
Zeit:

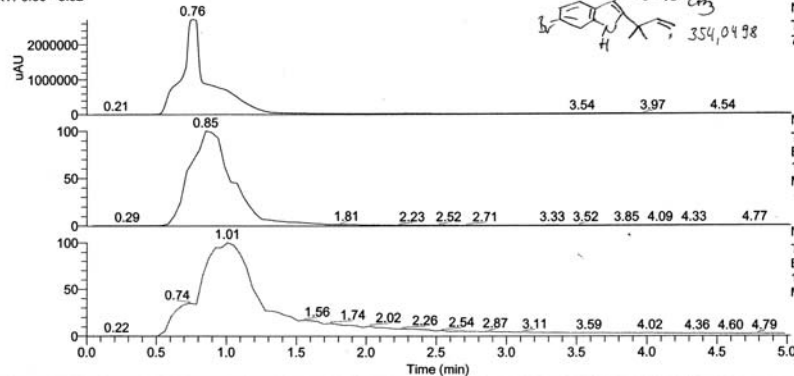

NL: 2.71E6  
Total Scan PDA  
7pbo171iii

NL: 3.40E8  
TIC F: FTMS - p  
ESI Full ms [ 100.00-1000.00]  
MS 7pbo171iii

NL: 3.46E8  
TIC F: FTMS + p  
ESI Full ms [ 100.00-1000.00]  
MS 7pbo171iii

7pbo171iii #74-160 RT: 0.65-1.23 AV: 14 NL: 1.83E8  
F: FTMS + p ESI Full ms [ 100.00-1000.00]

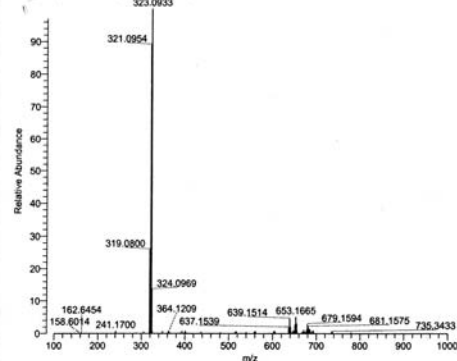

7pbo171iii #79-145 RT: 0.67-1.12 AV: 11 NL: 1.12E8  
F: FTMS - p ESI Full ms [ 100.00-1000.00]

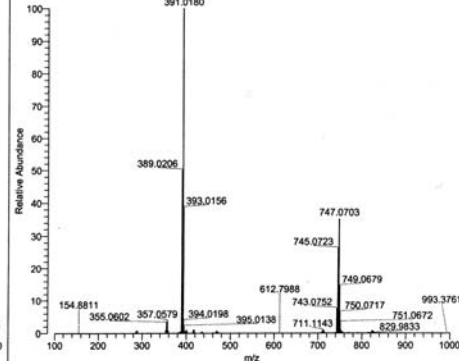

7pbo. #74-160 RT: 0.65-1.23 AV: 14 NL: 1.83E8  
F: FTMS + p ESI Full ms [ 100.00-1000.00]

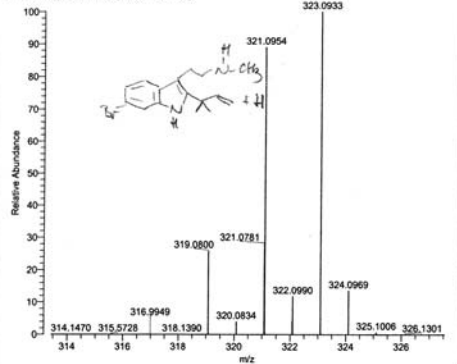

7pbo171iii #79-145 RT: 0.67-1.12 AV: 11 NL: 1.12E8  
F: FTMS - p ESI Full ms [ 100.00-1000.00]

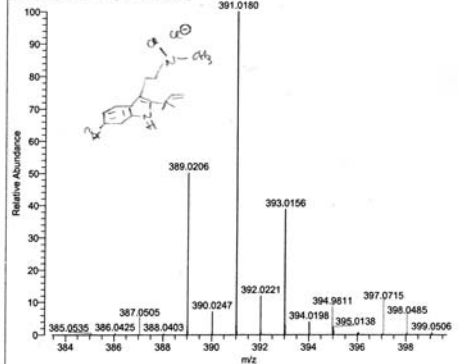

C<sub>16</sub>H<sub>20</sub>BrClN<sub>2</sub> 354.0498

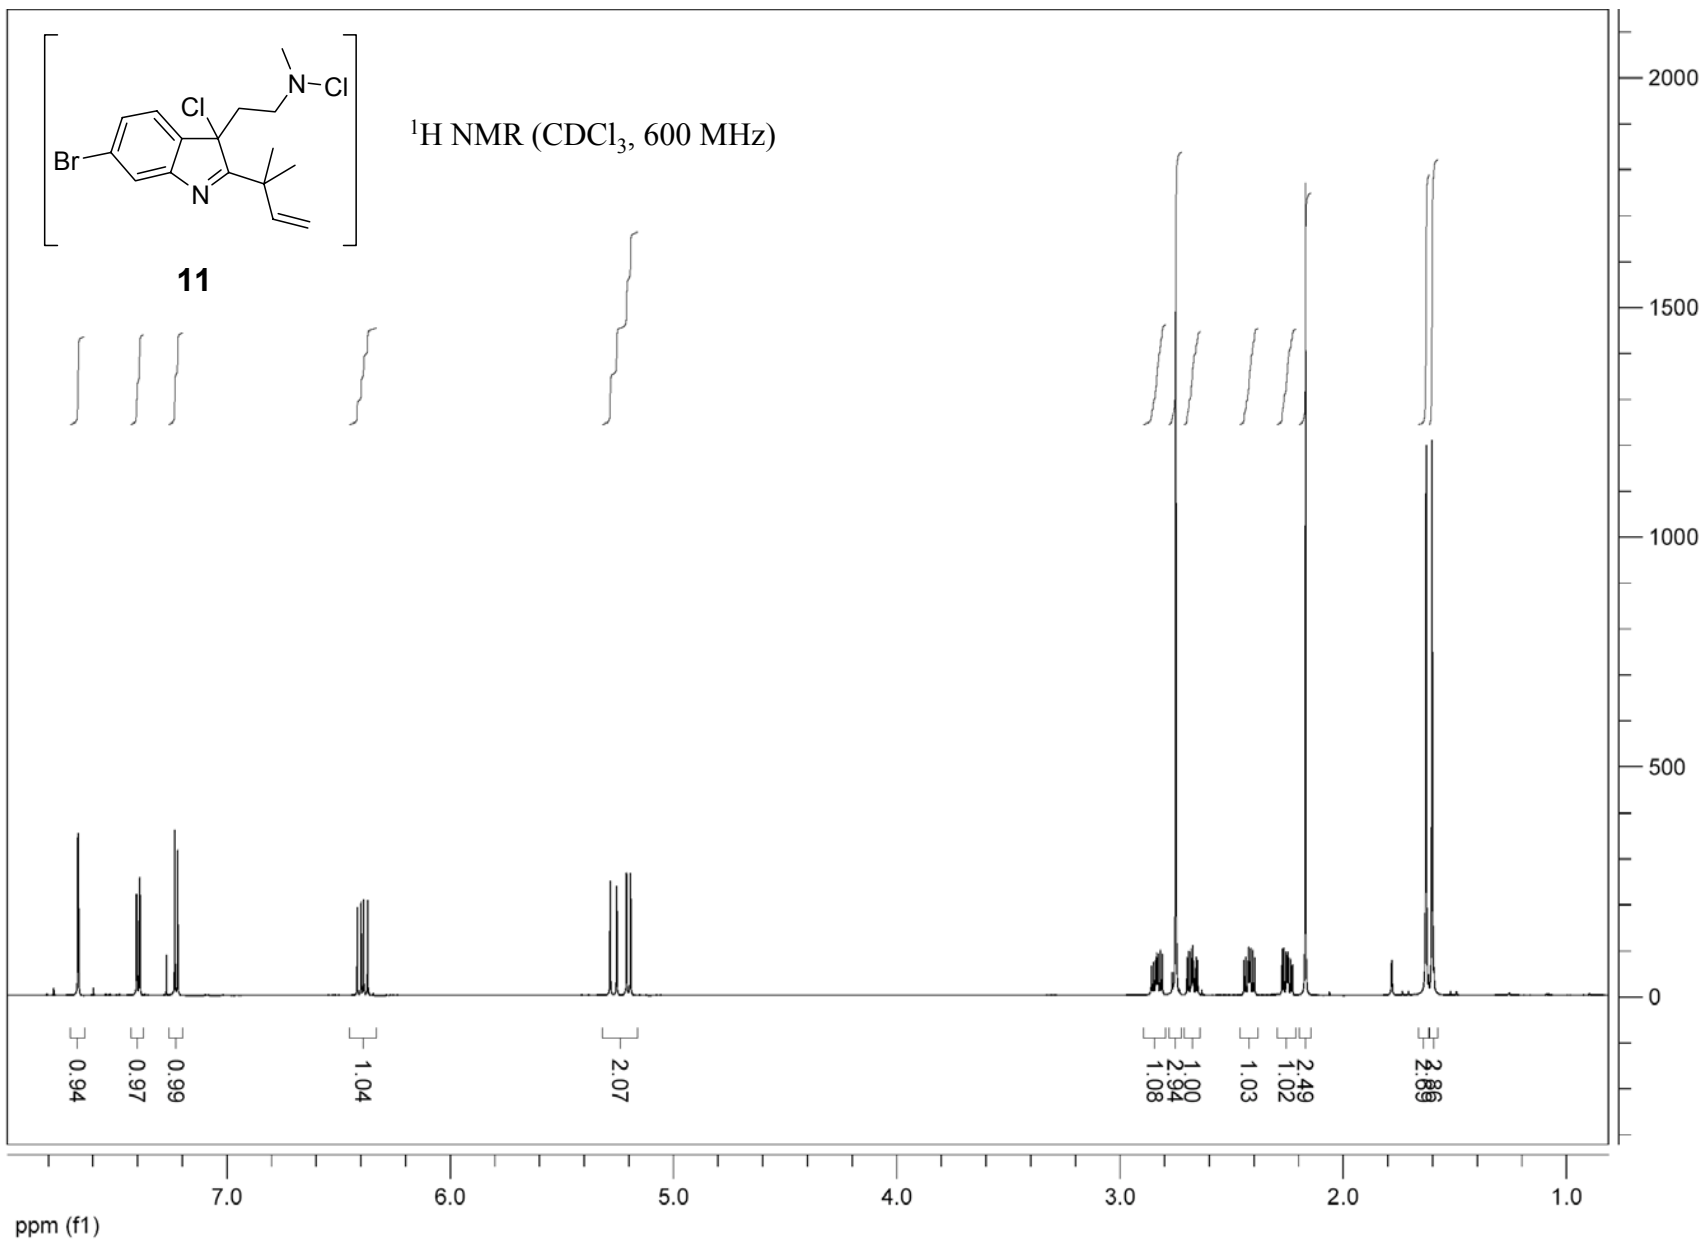

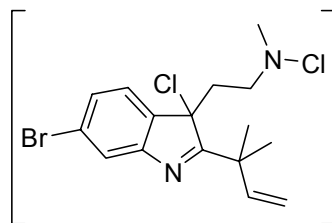

**11**

$^1\text{H}, ^{13}\text{C}$ -HMBC ( $\text{CDCl}_3$ , 400 MHz)

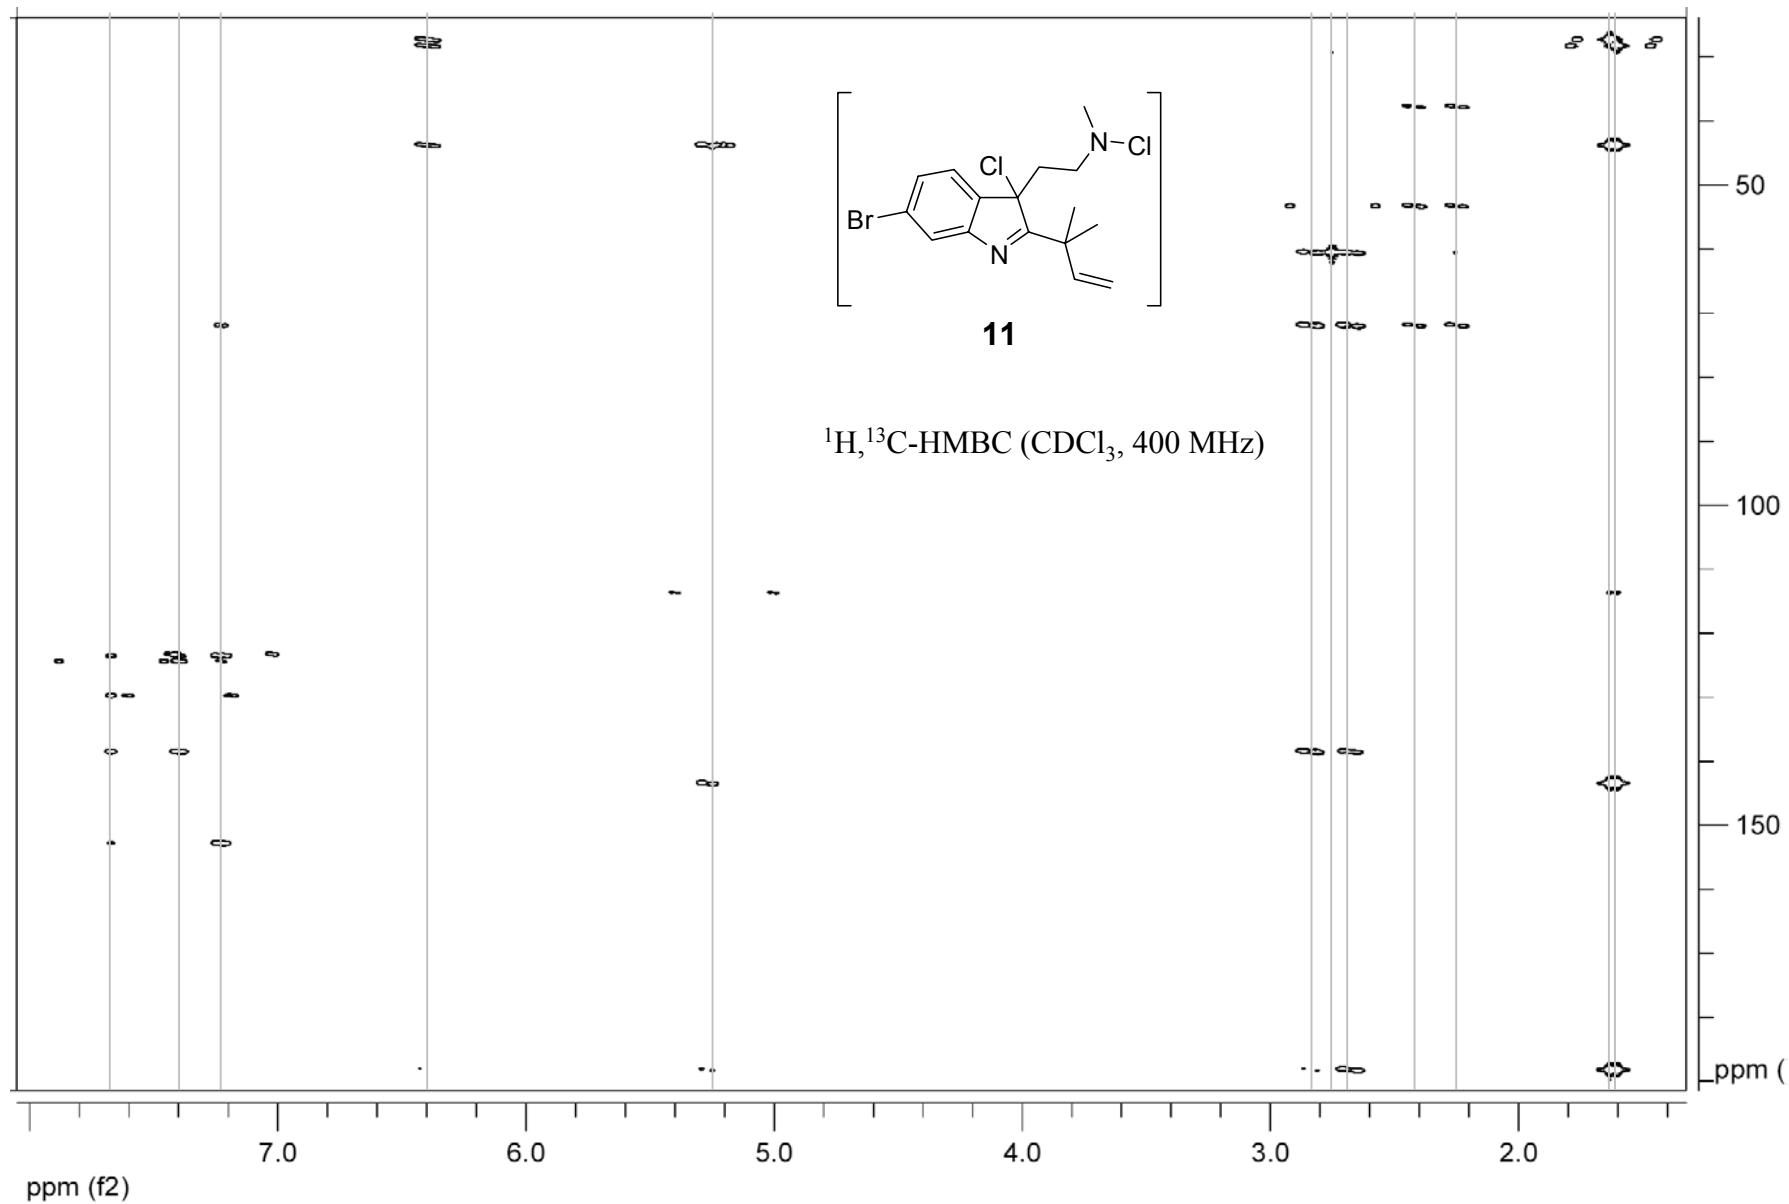

340

695

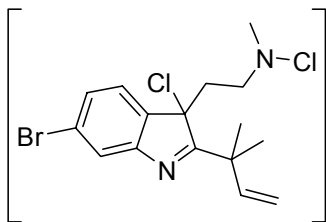**11** $^1\text{H}, ^{15}\text{N}$ -HMBC ( $\text{CDCl}_3$ , 600 MHz)

2.83, 2.74, 2.67, 2.40, 2.25/100.9

7.655/322.4

8.0 7.0 6.0 5.0 4.0 3.0 2.0 1.0 0.0  
ppm (f2)

ppm (f1)

# HRESIMS

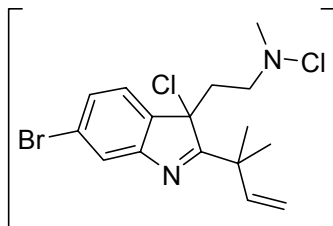

11

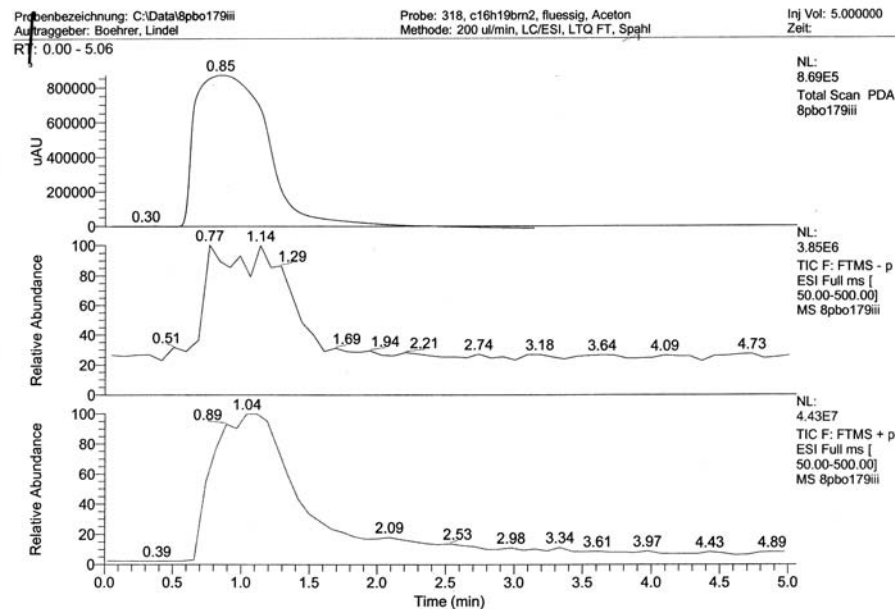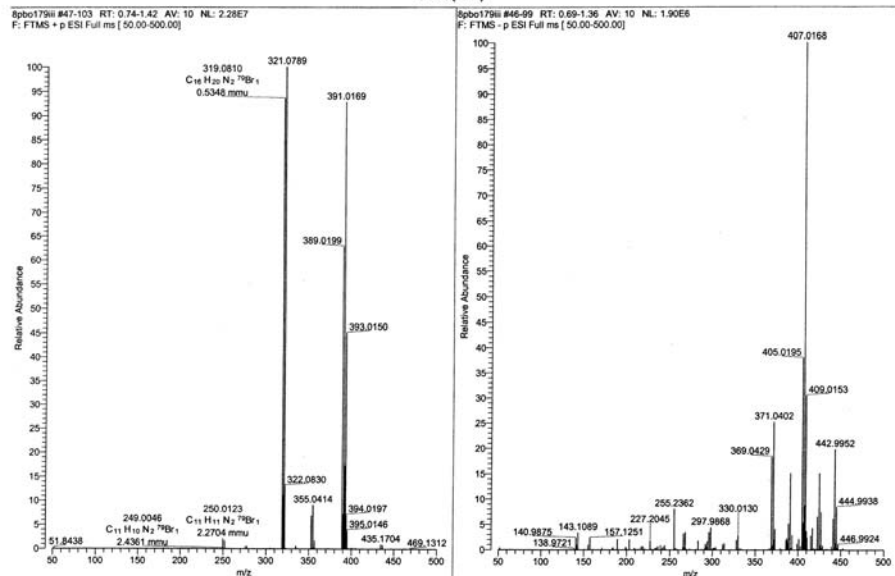

$C_{16}H_{19}BrN_2$  318.0732 |  $C_{16}H_{19}BrClN_2$  388.0109  
 $+H^+$  389.0187



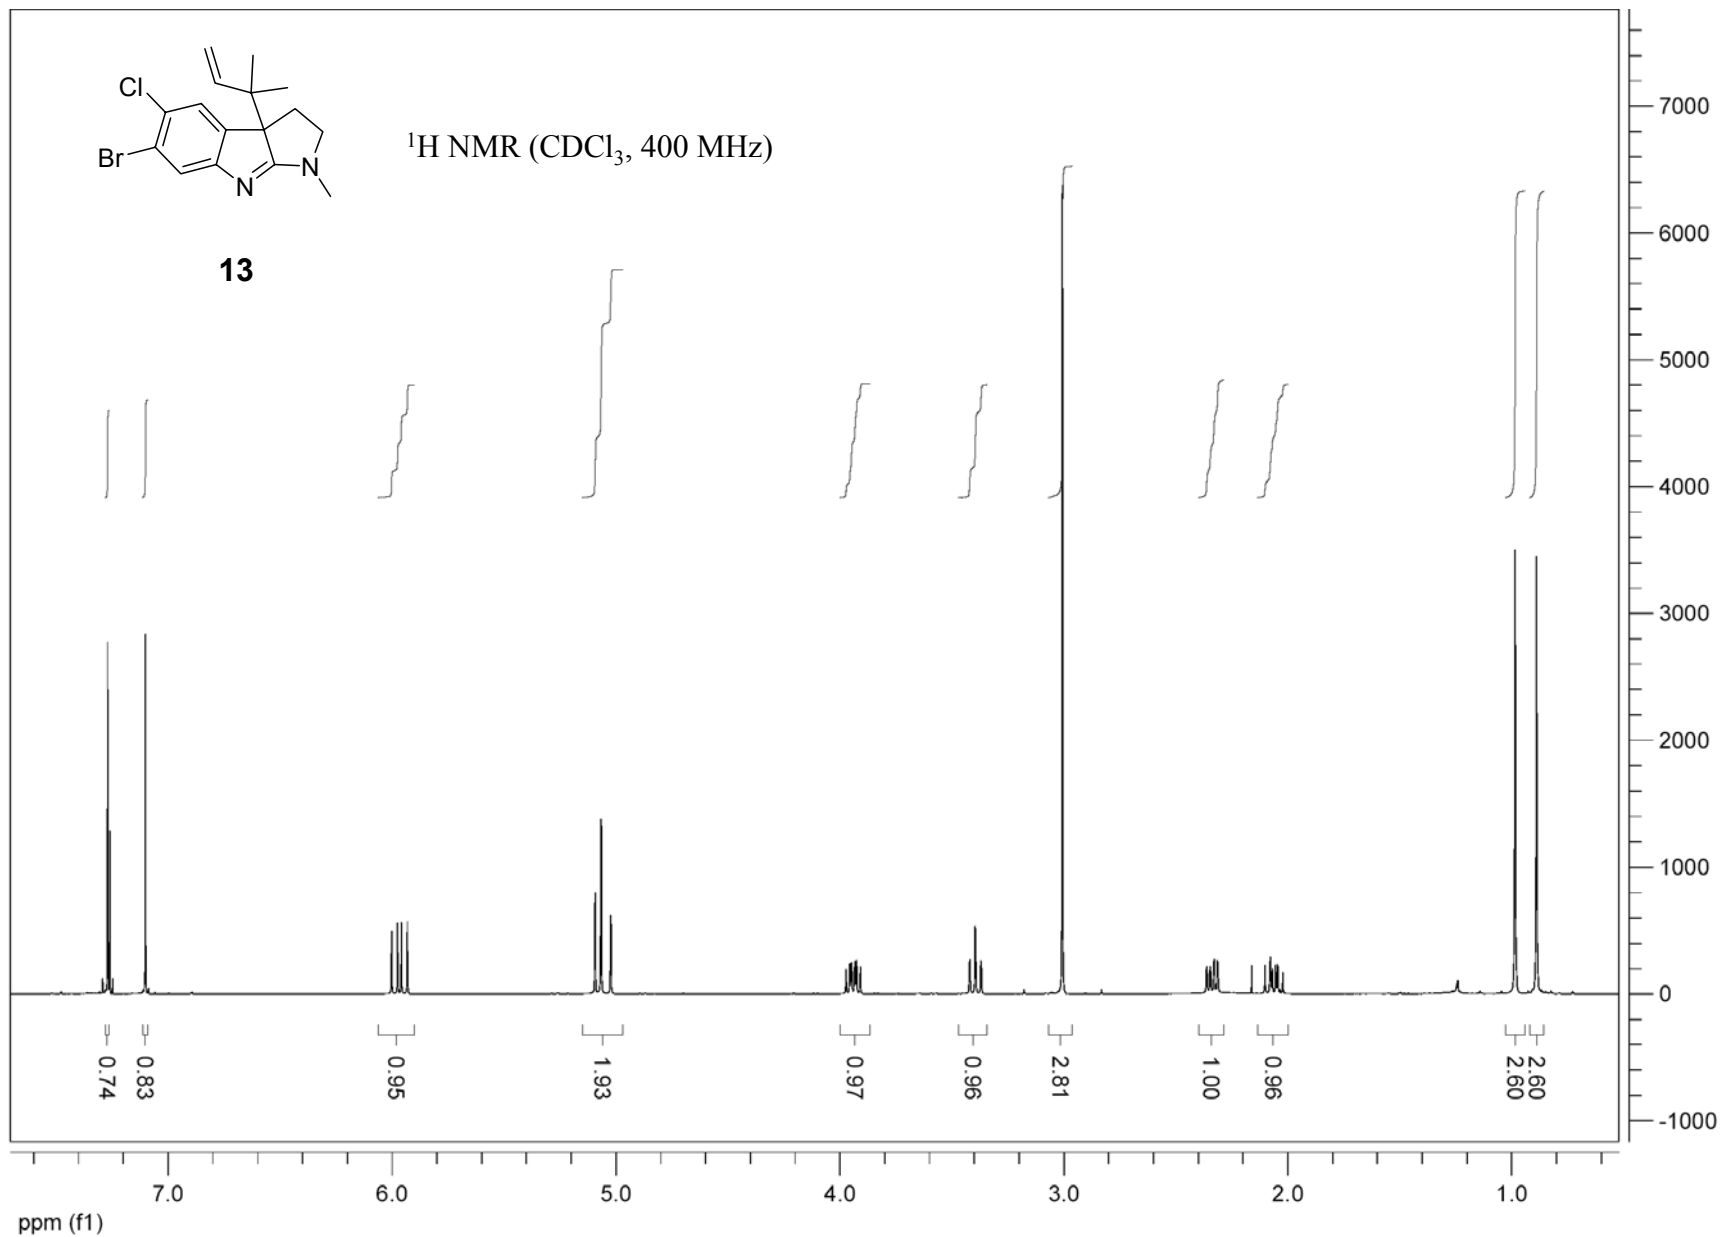

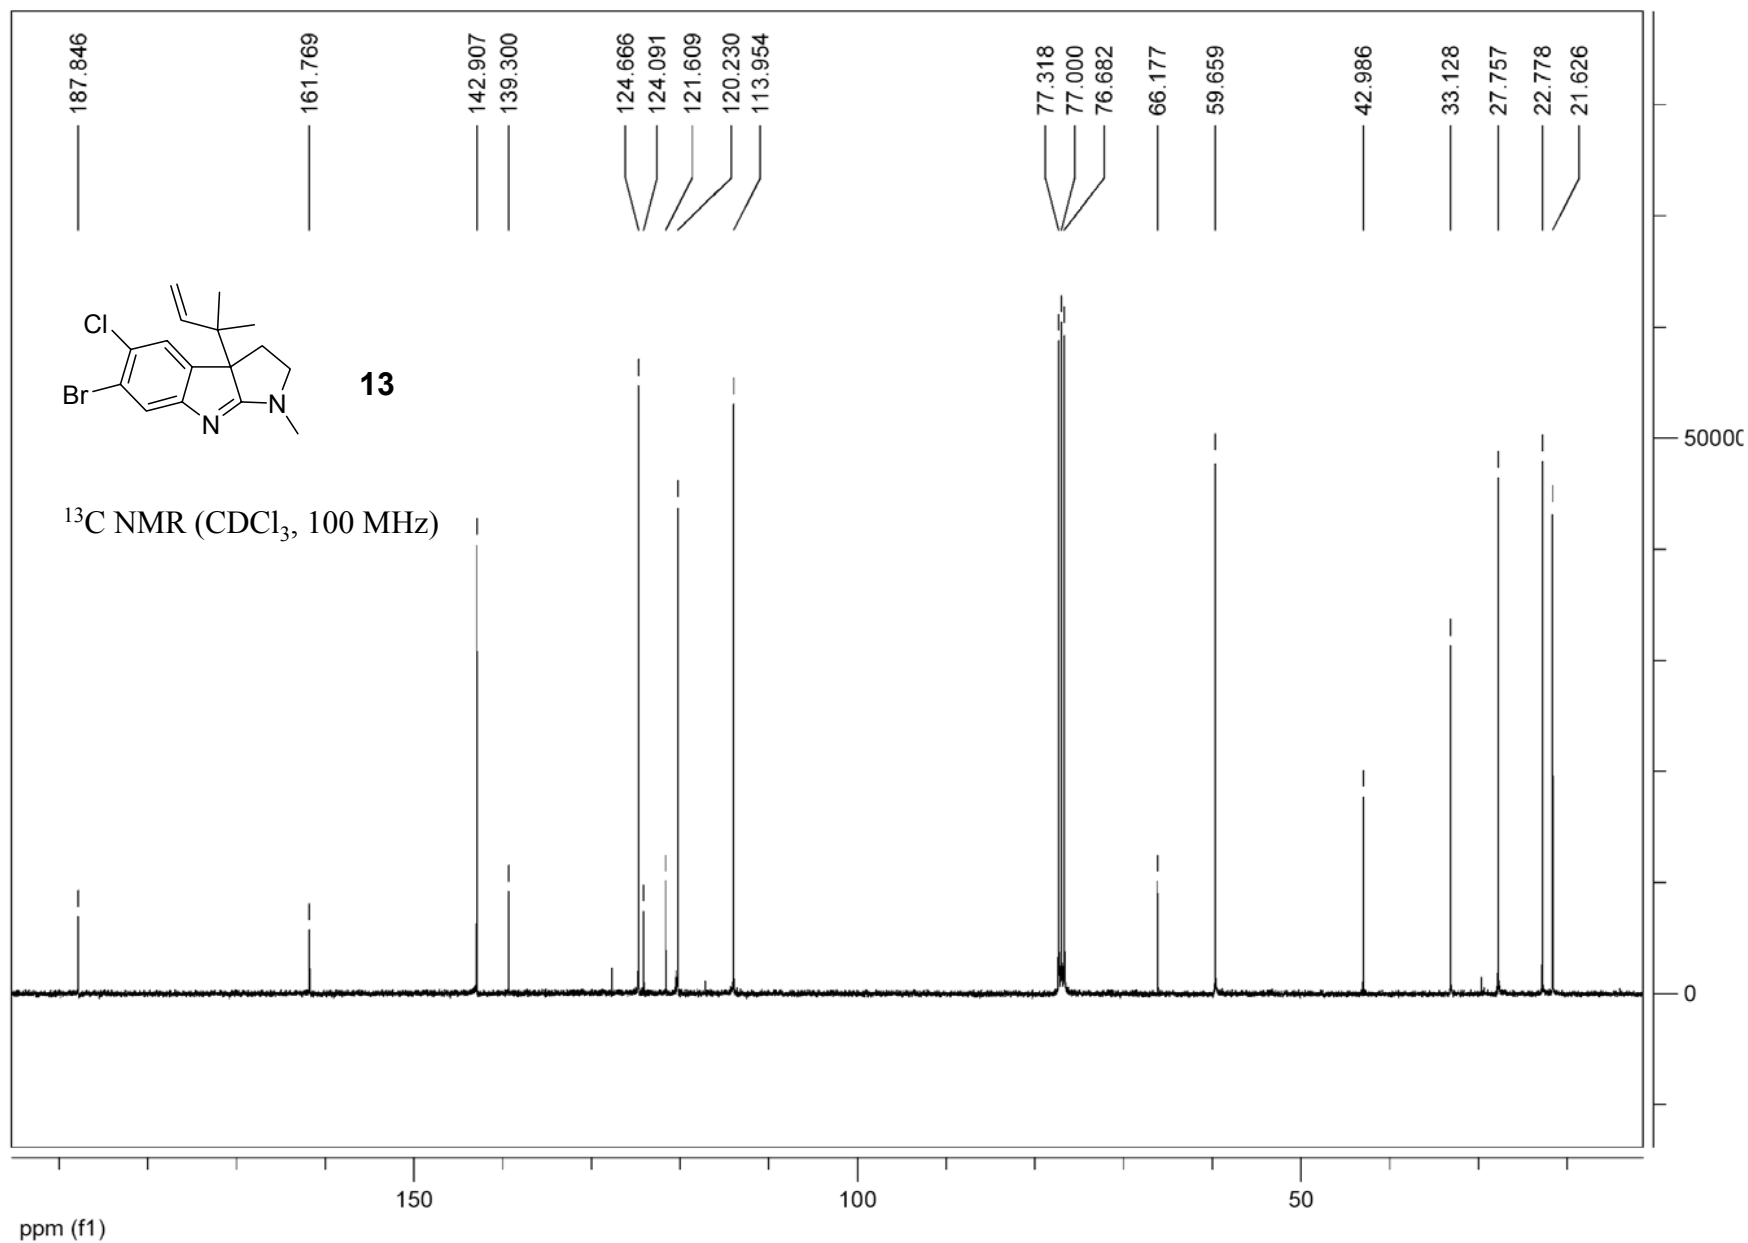

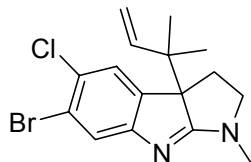

13

HREIMS

Analyse: C:\Data\bggocf2g-c6

Probe:

Client:

bggocf2g-c6#11 RT: 11.01 AV: 1 NL: 1.30E7

T: + c EI Full ms [ 39.50-550.50]

Methode:

Technik:

Operator:

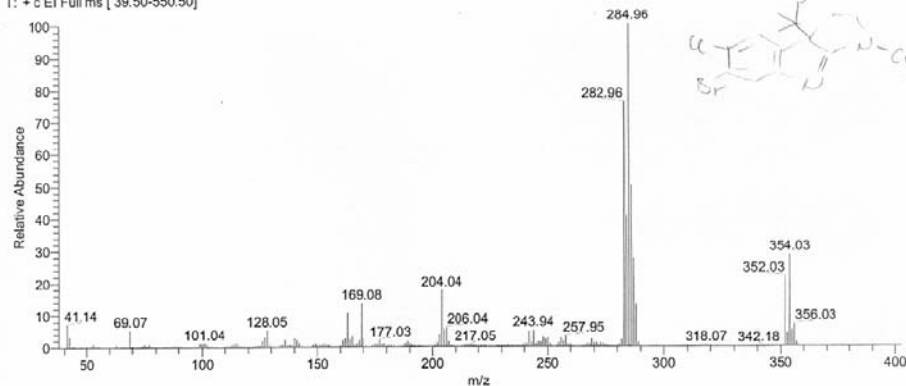

bggocf2g-c6#11 RT: 11.01

T: + c EI Full ms [ 39.50-550.50]

m/z= 37.5-552.5

| m/z      | Intensity  | Relative | Delta<br>(mmu) | RDB<br>equiv. | Composition                                                                                                |
|----------|------------|----------|----------------|---------------|------------------------------------------------------------------------------------------------------------|
| 163.0181 | 1390678.0  | 10.68    | -0.20          | 7.0           | C <sub>9</sub> H <sub>6</sub> N <sub>1</sub> <sup>35</sup> Cl <sub>1</sub>                                 |
|          |            |          | 5.83           | 7.5           | C <sub>10</sub> H <sub>6</sub> <sup>37</sup> Cl <sub>1</sub>                                               |
| 169.0759 | 1768161.0  | 13.58    | -0.11          | 8.5           | C <sub>11</sub> H <sub>9</sub> N <sub>2</sub>                                                              |
|          |            |          | -1.94          | 3.5           | C <sub>10</sub> H <sub>14</sub> <sup>35</sup> Cl <sub>1</sub>                                              |
| 204.0437 | 2300534.0  | 17.66    | -1.16          | 8.0           | C <sub>11</sub> H <sub>9</sub> N <sub>2</sub> <sup>35</sup> Cl <sub>1</sub>                                |
|          |            |          | 4.87           | 8.5           | C <sub>12</sub> H <sub>9</sub> N <sub>1</sub> <sup>37</sup> Cl <sub>1</sub>                                |
| 205.0469 | 714106.0   | 5.48     | 0.23           | 8.0           | C <sub>12</sub> H <sub>10</sub> N <sub>1</sub> <sup>37</sup> Cl <sub>1</sub>                               |
|          |            |          | 0.85           | 1.0           | C <sub>8</sub> H <sub>16</sub> N <sub>1</sub> <sup>79</sup> Br <sub>1</sub>                                |
| 206.0434 | 787631.0   | 6.05     | -0.32          | 3.0           | C <sub>10</sub> H <sub>14</sub> <sup>35</sup> Cl <sub>1</sub> <sup>37</sup> Cl <sub>1</sub>                |
|          |            |          | 1.51           | 8.0           | C <sub>11</sub> H <sub>9</sub> N <sub>2</sub> <sup>37</sup> Cl <sub>1</sub>                                |
| 282.9630 | 9881088.0  | 75.87    | -0.19          | 7.5           | C <sub>11</sub> H <sub>9</sub> N <sub>2</sub> <sup>79</sup> Br <sub>1</sub> <sup>35</sup> Cl <sub>1</sub>  |
|          |            |          | -0.81          | 14.5          | C <sub>15</sub> H <sub>3</sub> N <sub>2</sub> <sup>35</sup> Cl <sub>1</sub> <sup>37</sup> Cl <sub>1</sub>  |
| 283.9684 | 5300446.0  | 40.70    | 2.51           | 7.5           | C <sub>12</sub> H <sub>10</sub> N <sub>1</sub> <sup>81</sup> Br <sub>1</sub> <sup>35</sup> Cl <sub>1</sub> |
|          |            |          | -2.61          | 7.0           | C <sub>11</sub> H <sub>10</sub> N <sub>2</sub> <sup>79</sup> Br <sub>1</sub> <sup>35</sup> Cl <sub>1</sub> |
| 284.9608 | 13024512.0 | 100.00   | -0.42          | 7.5           | C <sub>11</sub> H <sub>9</sub> N <sub>2</sub> <sup>81</sup> Br <sub>1</sub> <sup>35</sup> Cl <sub>1</sub>  |
|          |            |          | 0.49           | 7.5           | C <sub>11</sub> H <sub>9</sub> N <sub>2</sub> <sup>79</sup> Br <sub>1</sub> <sup>37</sup> Cl <sub>1</sub>  |
| 285.9663 | 6532315.0  | 50.15    | -1.80          | 7.0           | C <sub>11</sub> H <sub>10</sub> N <sub>2</sub> <sup>79</sup> Br <sub>1</sub> <sup>37</sup> Cl <sub>1</sub> |
|          |            |          | -2.70          | 7.0           | C <sub>11</sub> H <sub>10</sub> N <sub>2</sub> <sup>81</sup> Br <sub>1</sub> <sup>35</sup> Cl <sub>1</sub> |
| 286.9603 | 3550814.0  | 27.26    | 0.25           | 2.5           | C <sub>10</sub> H <sub>14</sub> <sup>81</sup> Br <sub>1</sub> <sup>35</sup> Cl <sub>1</sub>                |
|          |            |          |                |               | <sup>37</sup> Cl <sub>1</sub>                                                                              |
|          |            |          | 2.08           | 7.5           | C <sub>11</sub> H <sub>9</sub> N <sub>2</sub> <sup>81</sup> Br <sub>1</sub> <sup>37</sup> Cl <sub>1</sub>  |
| 287.9654 | 1710671.0  | 13.13    | -0.04          | 0.0           | C <sub>7</sub> H <sub>16</sub> N <sub>2</sub> <sup>79</sup> Br <sub>1</sub> <sup>81</sup> Br <sub>1</sub>  |
|          |            |          | -0.66          | 7.0           | C <sub>11</sub> H <sub>10</sub> N <sub>2</sub> <sup>81</sup> Br <sub>1</sub> <sup>37</sup> Cl <sub>1</sub> |
| 352.0320 | 2825067.0  | 21.69    | -1.63          | 8.0           | C <sub>16</sub> H <sub>18</sub> N <sub>2</sub> <sup>79</sup> Br <sub>1</sub> <sup>35</sup> Cl <sub>1</sub> |
| 354.0306 | 3685748.0  | 28.30    | -0.09          | 8.0           | C <sub>16</sub> H <sub>18</sub> N <sub>2</sub> <sup>79</sup> Br <sub>1</sub> <sup>37</sup> Cl <sub>1</sub> |
|          |            |          | -0.99          | 8.0           | C <sub>16</sub> H <sub>18</sub> N <sub>2</sub> <sup>81</sup> Br <sub>1</sub> <sup>35</sup> Cl <sub>1</sub> |
| 356.0291 | 912112.0   | 7.00     | 0.43           | 8.0           | C <sub>16</sub> H <sub>18</sub> N <sub>2</sub> <sup>81</sup> Br <sub>1</sub> <sup>37</sup> Cl <sub>1</sub> |

$^1\text{H}$  NMR,  $\text{CDCl}_3$ , 400 MHz

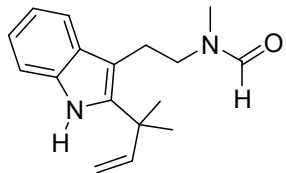

**5** (two rotamers)

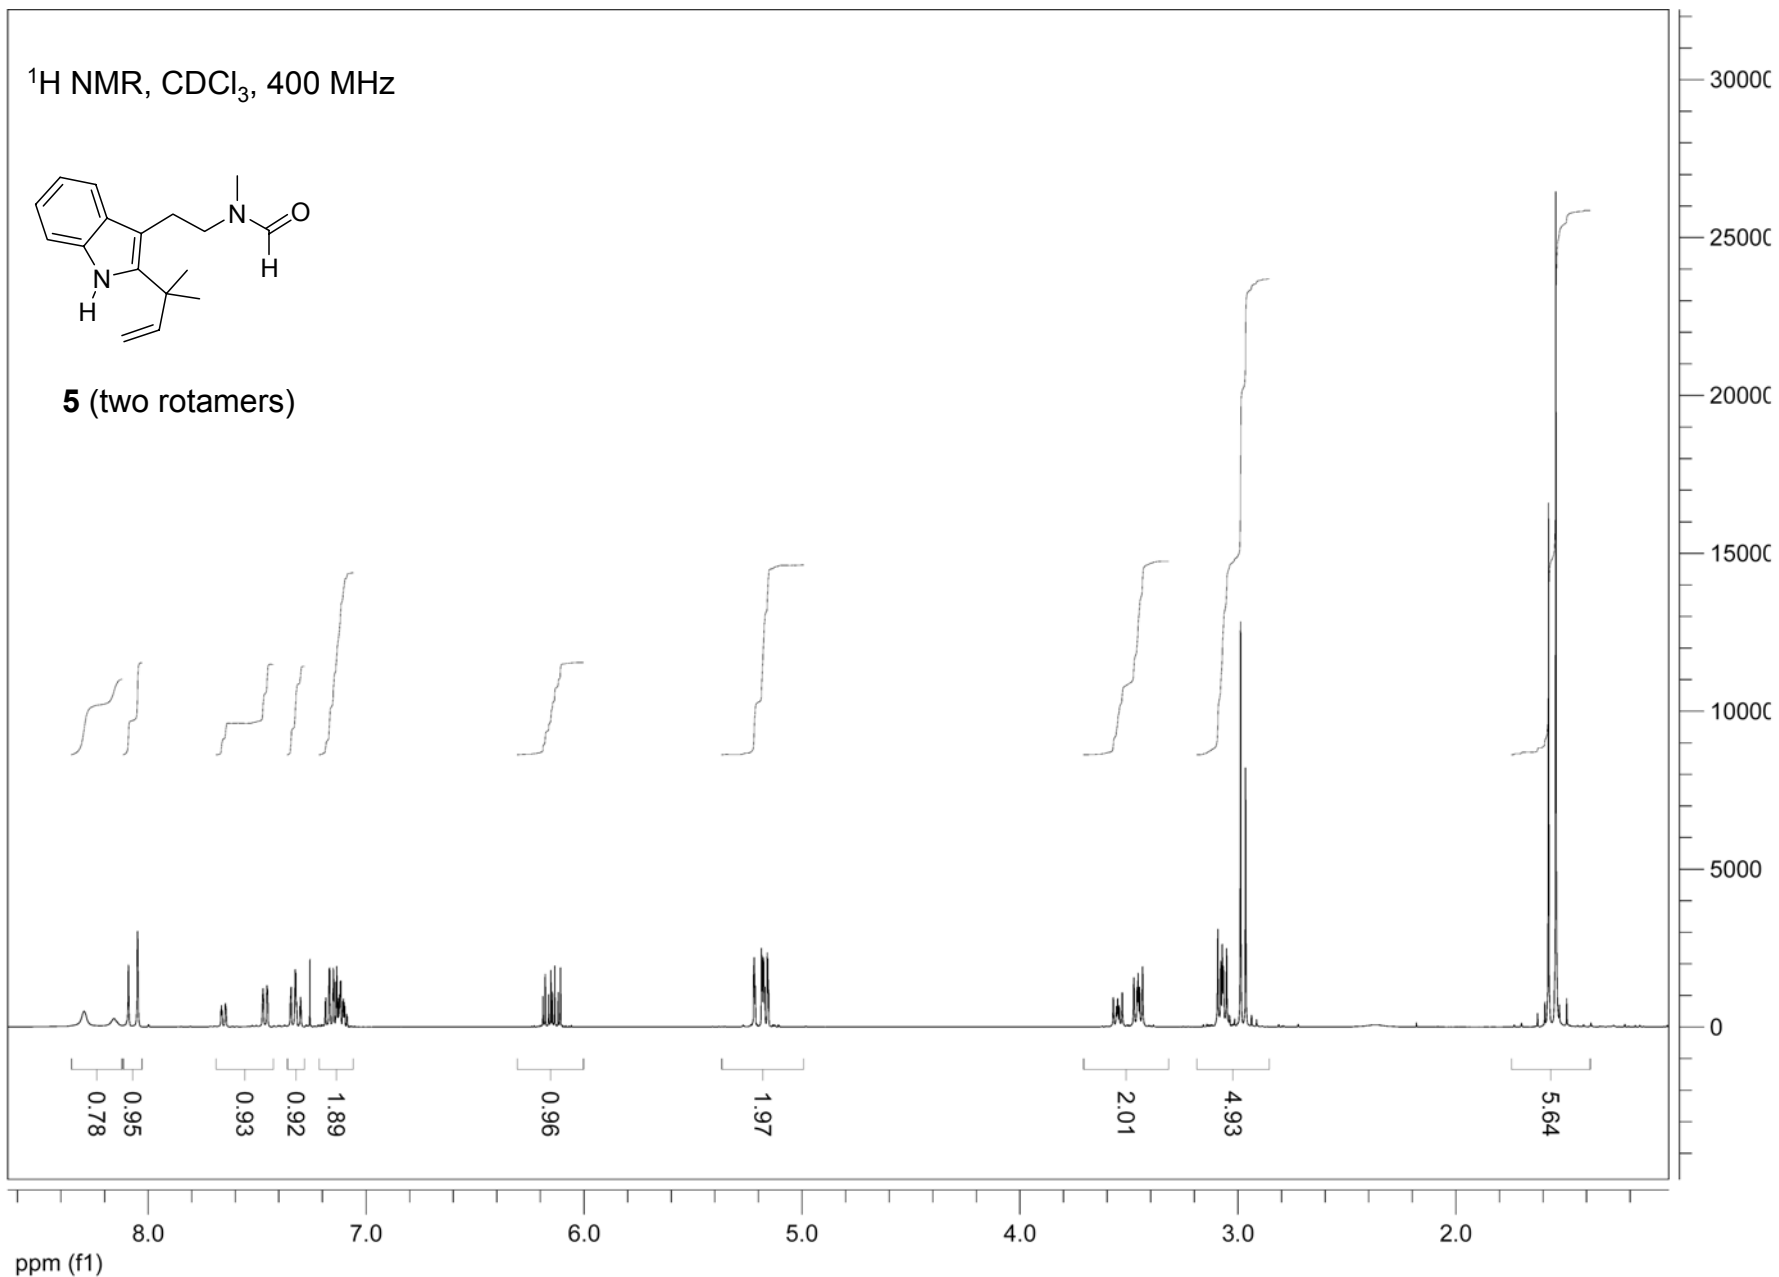

$^{13}\text{C}$  NMR,  $\text{CDCl}_3$ , 100 MHz

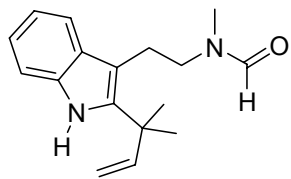

**5** (two rotamers)

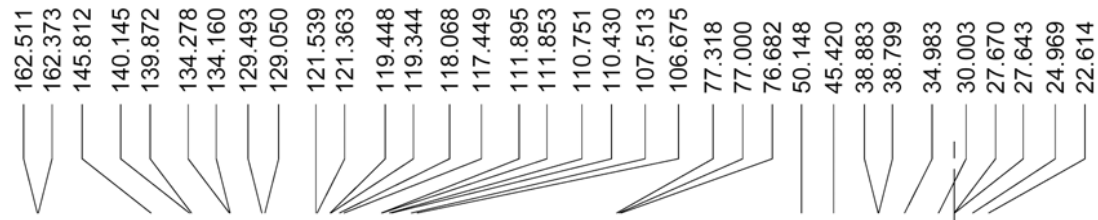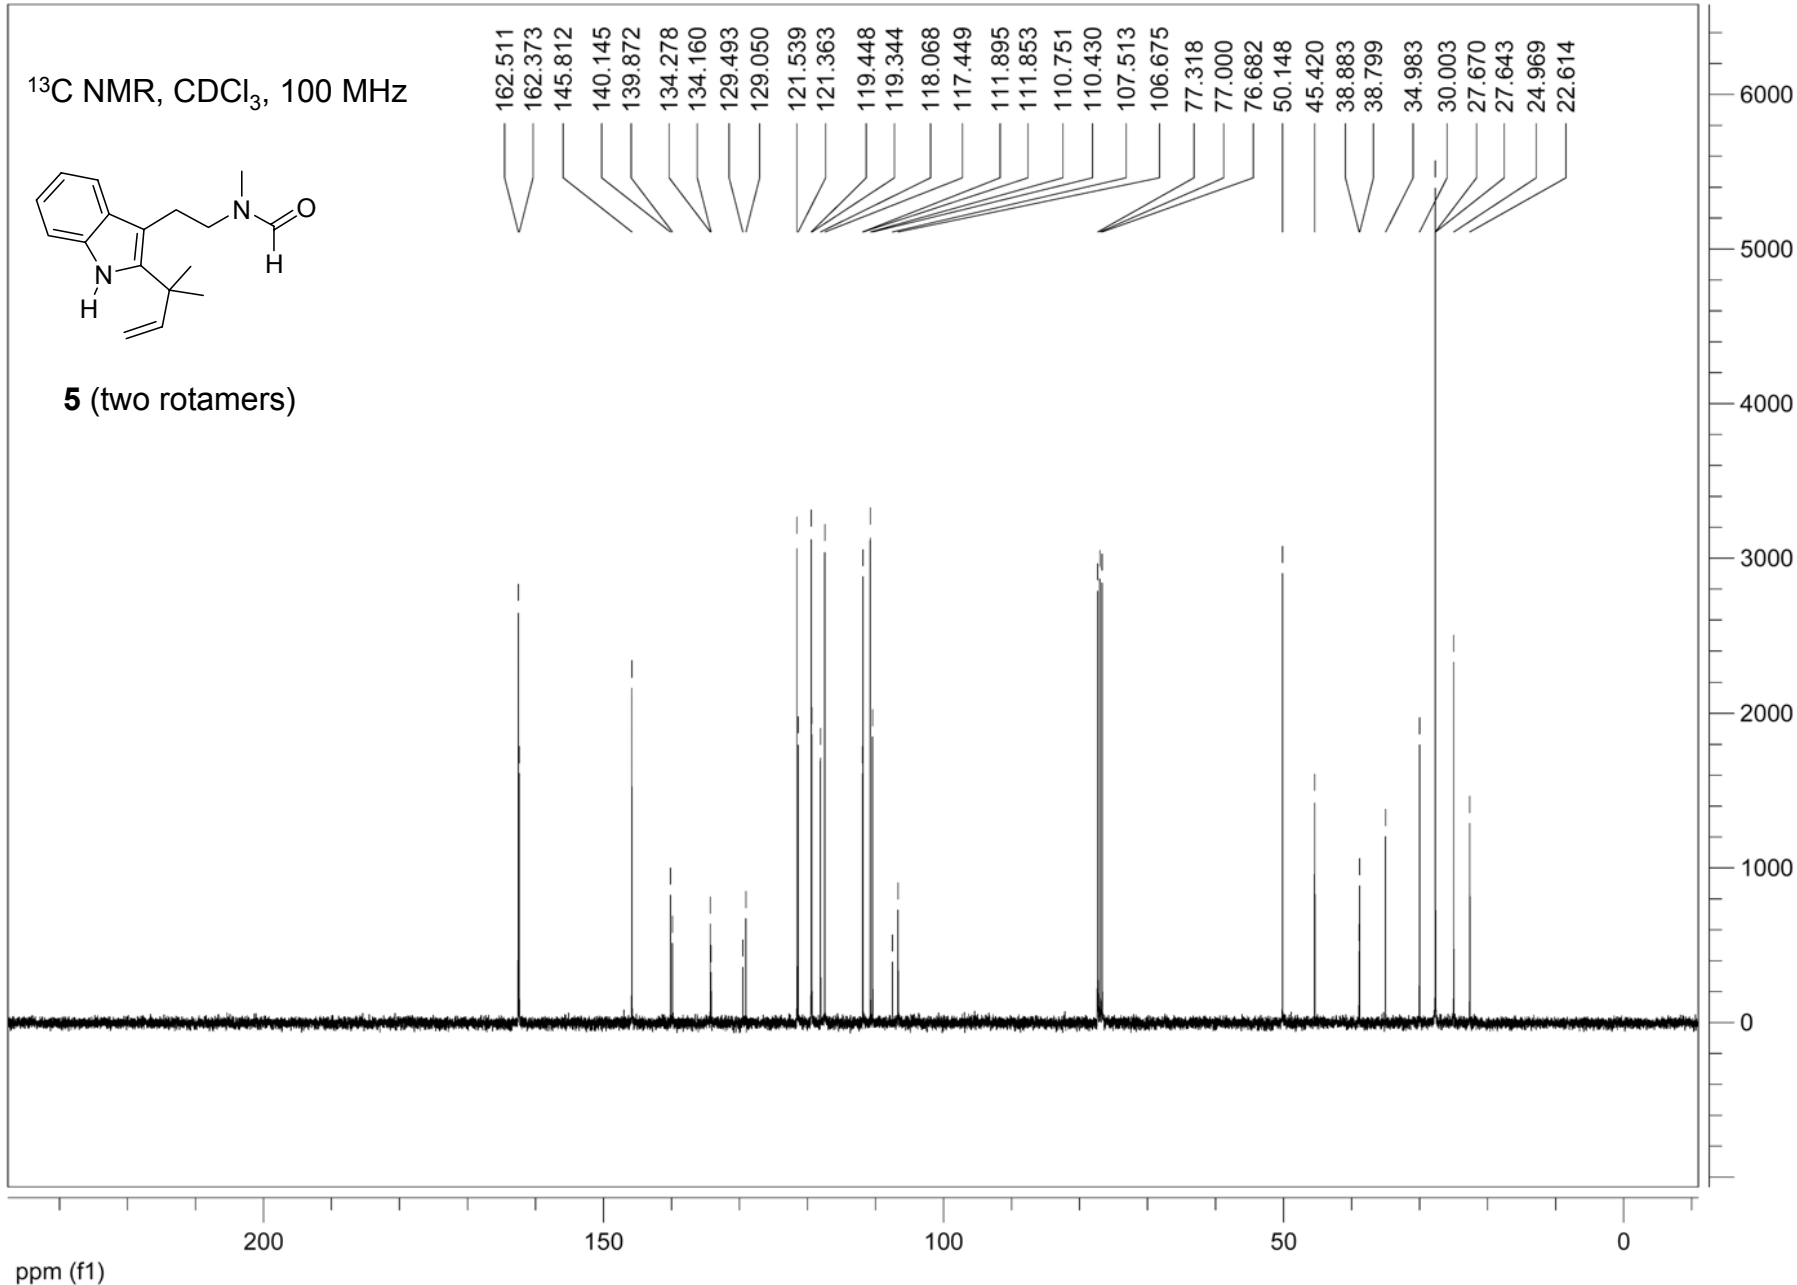

# HREIMS

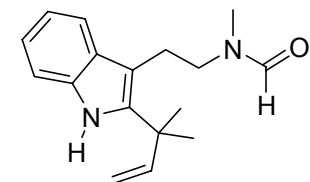

5 (two rotamers)

SPEC: 31aul1532-c1 06-Mar-03 Elapse: 10:50.7 518  
 Samp: Vial 3 270. c17h22n2o, fest. Chloroform Start: 11:22:19 534  
 Comm: CS Supreme-5, 50°C (1 min)-300°C (4 min) mit 25'/min  
 Mode: EI +VE +LMR BSCAN (EXP) UP HR NRM Study: GC/EI, MAT 95Q  
 Oper: Spahl Client: Krauss, Lindel Inlet: GC Vial 3  
 Data: CMASS : converted

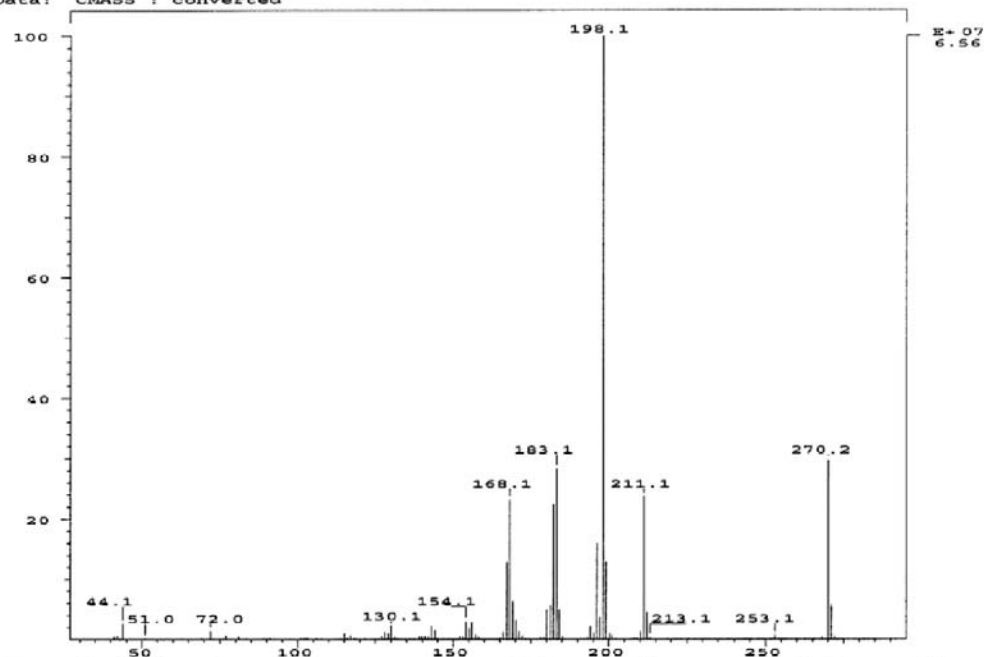

LIST: 31aul1532-c1 06-Mar-03 Elapse: 10:50.7 518  
 Samp: Vial 3 270. c17h22n2o, fest. Chloroform Start: 11:22:19 534  
 Comm: CS Supreme-5, 50°C (1 min)-300°C (4 min) mit 25'/min  
 Mode: EI +VE +LMR BSCAN (EXP) UP HR NRM Study: GC/EI, MAT 95Q  
 Oper: Spahl Client: Krauss, Lindel Inlet: GC Vial 3  
 Limit: 0  
 Peak: 1345. C100.M100.O.N2  
 Data: CMASS : converted

| Mass     | Intensity | %RA    | %RIC  | Delta | R+D | Composition  |
|----------|-----------|--------|-------|-------|-----|--------------|
| 44.0963  | 1708795   | 8.78   | 0.72  |       |     |              |
| 72.0449  | 951189    | 4.89   | 0.40  | -0.1  | 1.5 | C3.H6.O.N    |
| 77.0396  | 426309    | 2.19   | 0.18  | -0.4  | 4.5 | C6.H5        |
| 115.0564 | 661170    | 3.40   | 0.28  | -1.6  | 6.5 | C9.H7        |
| 117.0602 | 460115    | 2.36   | 0.20  | -2.3  | 6.0 | C8.H7.N      |
| 127.051  | 418836    | 2.15   | 0.18  | -0.3  | 7.5 | C10.H7       |
| 128.0576 | 854753    | 4.39   | 0.36  |       |     |              |
| 129.0674 | 623806    | 3.20   | 0.26  | 3.0   | 6.5 | C10.H9       |
| 130.0668 | 1539054   | 7.91   | 0.65  | -1.1  | 6.5 | C9.H8.N      |
| 143.0767 | 1463970   | 7.52   | 0.62  | -3.3  | 7.0 | C10.H9.N     |
| 144.0824 | 1019512   | 5.24   | 0.43  | -1.1  | 6.3 | C10.H10.N    |
| 154.0859 | 1969278   | 10.12  | 0.83  | -0.3  | 8.5 | C11.H8.N     |
| 155.0734 | 1193879   | 6.13   | 0.51  | 0.1   | 8.0 | C11.H9.N     |
| 156.0819 | 1918747   | 9.86   | 0.81  | -0.6  | 7.5 | C11.H10.N    |
| 157.0899 | 502105    | 2.58   | 0.21  | -0.7  | 7.0 | C11.H11.N    |
| 166.0677 | 819524    | 4.21   | 0.35  | -2.0  | 9.5 | C12.H8.N     |
| 167.0737 | 8402176   | 43.16  | 3.56  | -0.2  | 9.0 | C12.H9.N     |
| 168.0815 | 15191040  | 78.03  | 6.44  | -0.1  | 8.5 | C12.H10.N    |
| 169.0886 | 4080185   | 20.96  | 1.73  | 0.6   | 8.0 | C12.H11.N    |
| 170.0966 | 2076033   | 10.66  | 0.88  | -0.7  | 7.5 | C12.H12.N    |
| 171.1058 | 910978    | 4.68   | 0.39  | -1.0  | 7.0 | C12.H13.N    |
| 180.0833 | 3144297   | 16.15  | 1.33  | -1.9  | 9.5 | C13.H10.N    |
| 181.0906 | 3692307   | 18.97  | 1.56  | -1.4  | 9.0 | C13.H11.N    |
| 182.0984 | 14739200  | 75.71  | 6.25  | -1.4  | 8.5 | C13.H12.N    |
| 183.1063 | 18556160  | 95.32  | 7.86  | -1.5  | 8.0 | C13.H13.N    |
| 184.1109 | 3196607   | 16.42  | 1.35  | 1.7   | 7.5 | C13.H14.N    |
| 194.0980 | 1405610   | 7.22   | 0.60  | -1.0  | 9.5 | C14.H12.N    |
| 195.1059 | 768637    | 3.95   | 0.33  | -1.1  | 9.0 | C14.H13.N    |
| 196.1132 | 10426368  | 53.56  | 4.42  | -0.5  | 8.5 | C14.H14.N    |
| 197.1183 | 2407330   | 12.37  | 1.02  | -2.1  | 8.0 | C14.H15.N    |
| 198.1301 | 65581056  | 336.87 | 27.00 | -1.9  | 7.5 | C14.H16.N    |
| 199.1326 | 8421088   | 43.26  | 3.57  | 3.5   | 7.0 | C14.H17.N    |
| 200.1326 | 688571    | 3.54   | 0.29  | -1.3  | 7.0 | C13.H16.N2   |
| 201.1065 | 449795    | 2.31   | 0.19  | 3.7   | 7.5 | C12.H13.O.N2 |
| 210.1284 | 886780    | 4.56   | 0.38  | -0.1  | 8.5 | C15.H16.N    |
| 211.1371 | 15561216  | 79.93  | 6.60  | -1.0  | 8.0 | C15.H17.N    |
| 212.1399 | 291975    | 15.00  | 1.24  | 4.1   | 7.5 | C15.H18.N    |
| 253.1355 | 440899    | 2.26   | 0.19  | -1.4  | 9.5 | C16.H17.O.N2 |
| 270.1757 | 19467520  | 100.00 | 8.25  | -2.4  | 8.0 | C17.H22.O.N2 |
| 271.1786 | 3743550   | 19.23  | 1.59  | -2.5  | 7.5 | C17.H23.O.N2 |

$^1\text{H}$  NMR,  $\text{CDCl}_3$ , 400 MHz

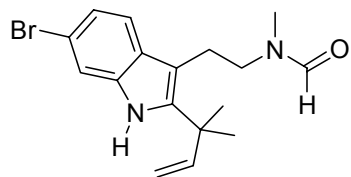

**6** (two rotamers)

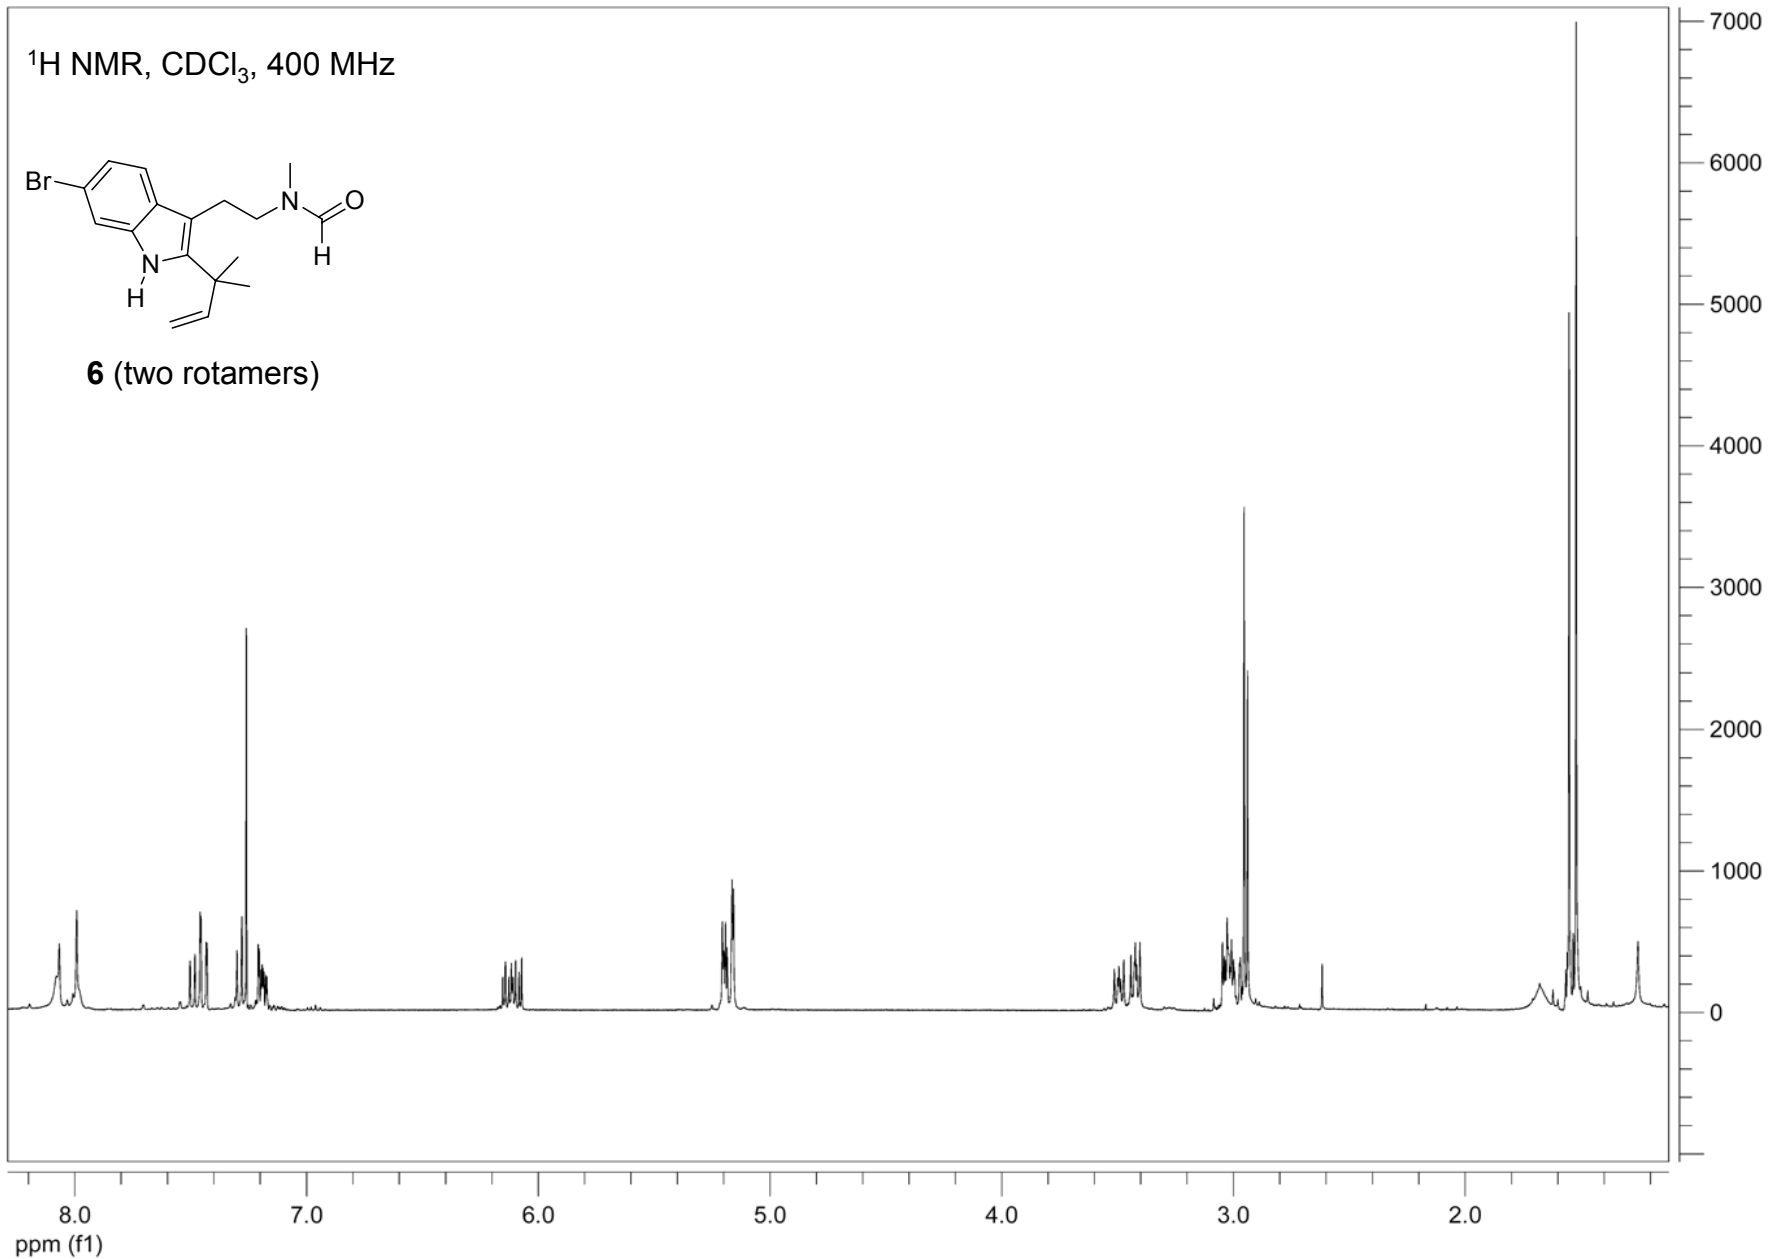

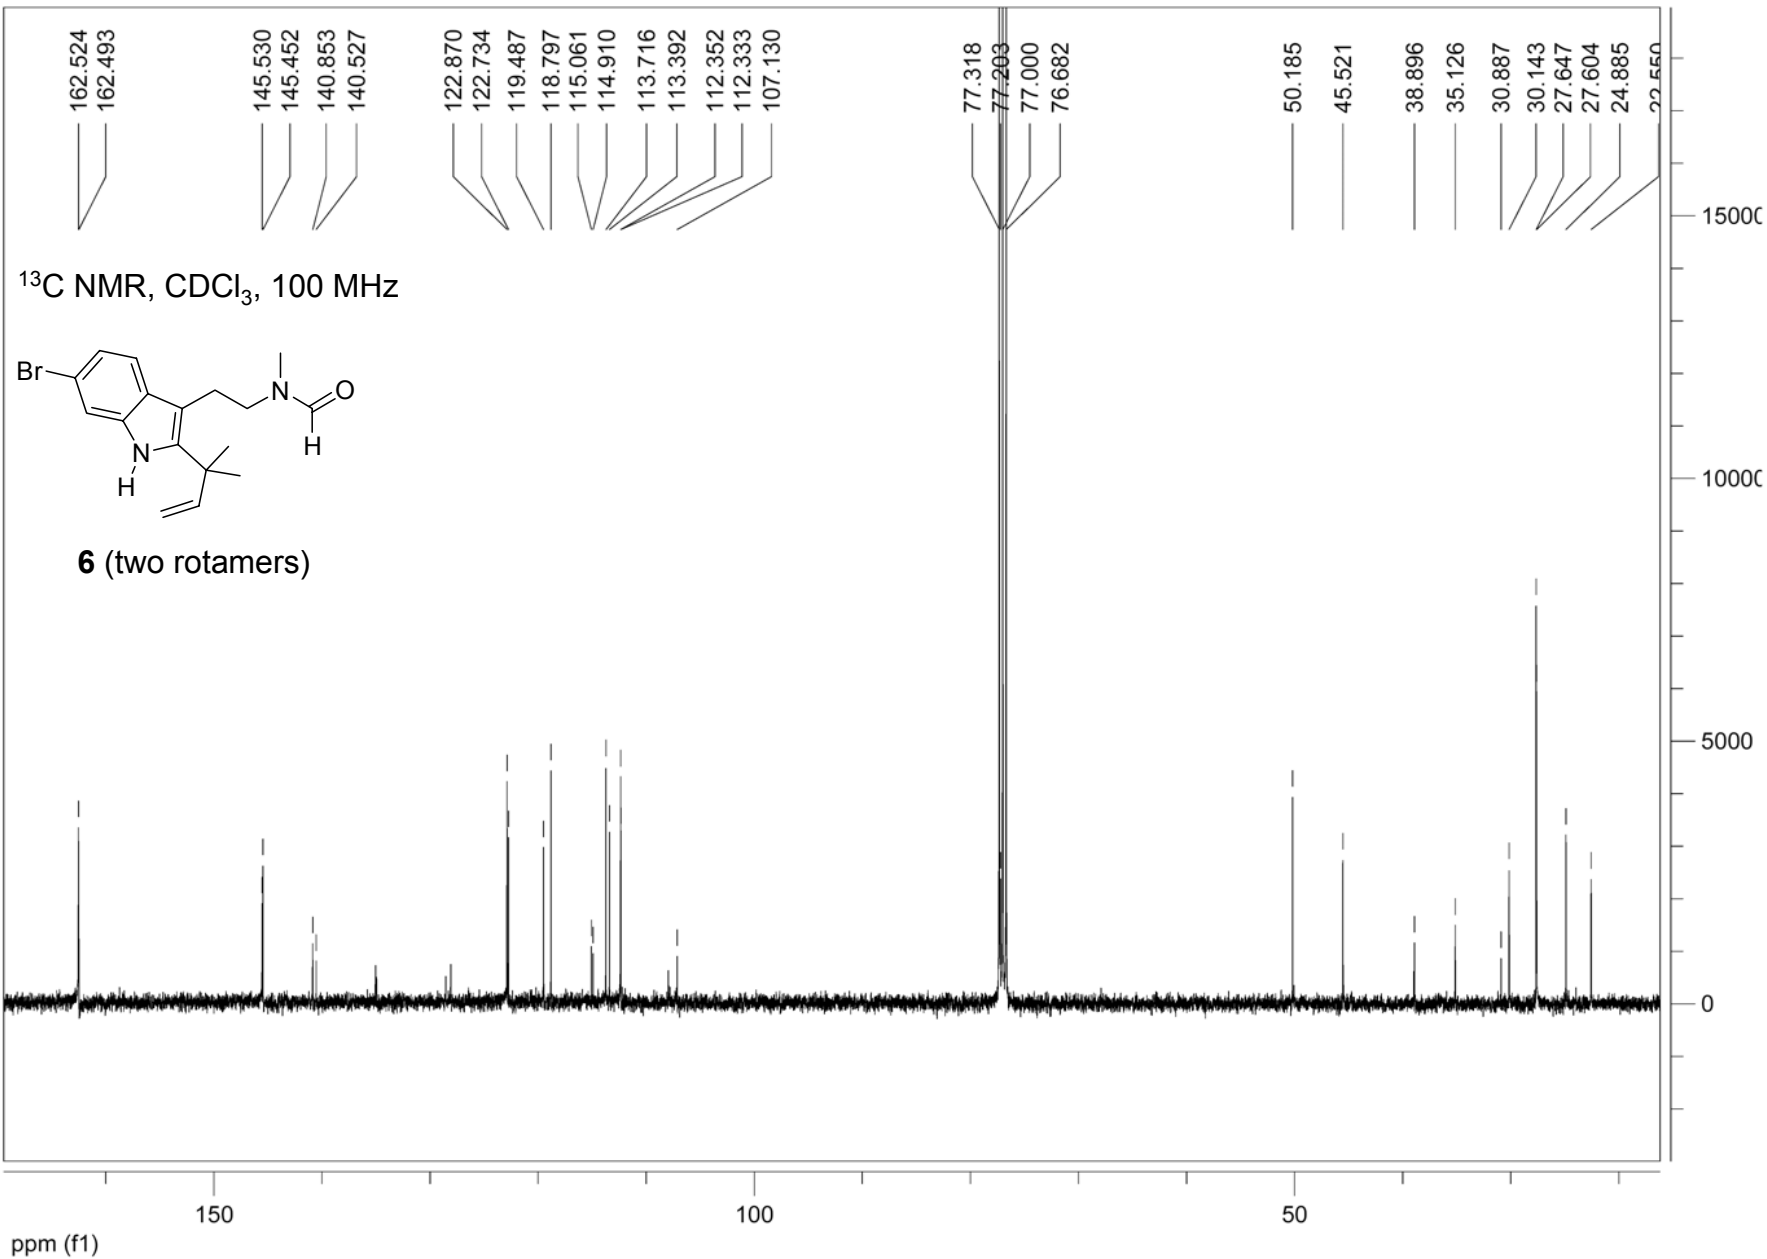



SPEC: 91au3892-c1 20-Sep-04 Elapse: 02:21.5 40  
 Samp: 348, C17H21BrN2O, gelcoest in Chloroform Start : 09:39:16 64  
 Comm: Faden, 20'-1600' mit 120' /min  
 Mode: EI +VE +LMR BSCAN (EXP) UP HR NRM Study : DEP/EI, MAT90  
 Oper: Tschuck Client: Brauchle, Lindel Inlet : DIP  
 Data: CMASS : converted

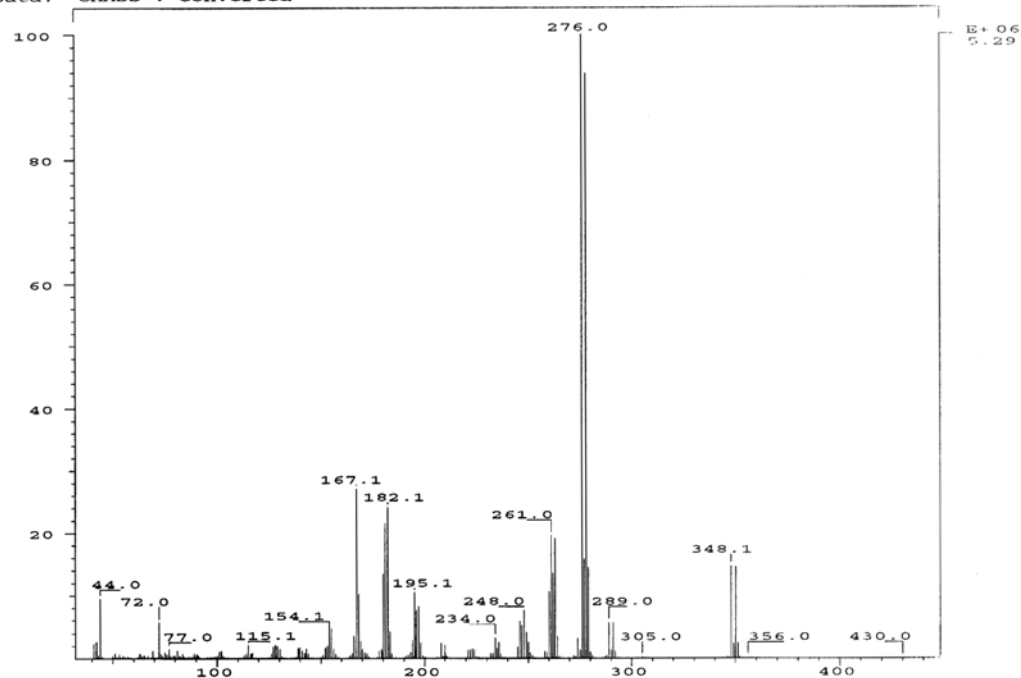

LIST: 91au3892-c1 20-Sep-04 Elapse: 02:21.5 40  
 Samp: 348, C17H21BrN2O, gelcoest in Chloroform Start : 09:39:16 64  
 Comm: Faden, 20'-1600' mit 120' /min  
 Mode: EI +VE +LMR BSCAN (EXP) UP HR NRM Study : DEP/EI, MAT90  
 Oper: Tschuck Client: Brauchle, Lindel Inlet : DIP  
 Limit: ( 0 )  
 Peak: ( 1424.00 ) C100.H100.O.Br.N2  
 Data: 1000.00 mmu R+D: -1.0 > 50.0  
 CMASS : converted

| Mass     | Intensity | %RA     | %RIC   | Delta | R+D  | Composition |
|----------|-----------|---------|--------|-------|------|-------------|
| 42.0261  | *         | 140215  | 2.65   | 0.41  | -4.3 | 2.0         |
| 44.0437  | *         | 500811  | 9.47   | 1.46  |      |             |
| 72.0435  | *         | 298001  | 5.63   | 0.87  |      |             |
| 154.0637 | *         | 276940  | 5.23   | 0.81  | 1.4  | 1.5         |
| 155.0718 | *         | 244282  | 4.62   | 0.71  | 1.7  | 8.0         |
| 166.0667 | *         | 188728  | 3.57   | 0.55  | -1.1 | 9.5         |
| 167.0726 | *         | 143185  | 2.70   | 0.48  | 0.9  | 9.0         |
| 168.0777 | *         | 540391  | 10.21  | 1.58  | 3.7  | 8.5         |
| 169.0842 | *         | 145480  | 2.75   | 0.43  | 4.9  | 8.0         |
| 180.0805 | *         | 711666  | 13.45  | 2.08  | 0.9  | 9.5         |
| 181.0884 | *         | 1143376 | 21.61  | 3.34  | 0.8  | 9.0         |
| 182.0968 | *         | 1275427 | 24.11  | 3.73  | 0.1  | 8.5         |
| 183.1012 | *         | 224403  | 4.24   | 0.66  | 3.6  | 8.0         |
| 194.0959 | *         | 154177  | 2.91   | 0.45  | 1.1  | 9.5         |
| 195.1054 | *         | 558021  | 10.55  | 1.63  | -0.6 | 9.0         |
| 196.1117 | *         | 404080  | 7.64   | 1.18  | 1.0  | 8.5         |
| 197.1209 | *         | 435436  | 8.23   | 1.27  | -0.4 | 8.0         |
| 198.1236 | *         | 131518  | 2.49   | 0.38  | 4.7  | 7.5         |
| 233.9878 | *         | 173819  | 3.29   | 0.51  | 4.0  | 7.5         |
| 235.9918 | *         | 136724  | 2.58   | 0.40  | 3.1  | 7.0         |
| 245.9894 | *         | 306343  | 5.79   | 0.90  | 2.4  | 8.5         |
| 246.9898 | *         | 272798  | 5.16   | 0.80  | -2.7 | 8.5         |
| 247.9924 | *         | 402838  | 7.61   | 1.18  | 2.5  | 8.0         |
| 248.9992 | *         | 220794  | 4.17   | 0.65  | 3.6  | 7.5         |
| 250.0048 | *         | 133825  | 2.53   | 0.39  |      |             |
| 260.0070 | *         | 563878  | 10.66  | 1.65  | 0.5  | 8.5         |
| 261.0123 | *         | 1034043 | 19.54  | 3.02  | 3.0  | 8.0         |
| 262.0084 | *         | 171512  | 13.52  | 2.09  | 2.2  | 8.0         |
| 263.0128 | *         | 1012901 | 19.15  | 2.96  |      |             |
| 264.0169 | *         | 182516  | 3.45   | 0.53  | -1.9 | 7.0         |
| 274.0200 | *         | 169737  | 3.21   | 0.50  | 3.1  | 8.5         |
| 276.0394 | *         | 5291028 | 100.00 | 15.46 | -0.6 | 7.5         |
| 277.0419 | *         | 839972  | 15.87  | 1.7   | 18.5 |             |
| 278.0351 | *         | 4961611 | 93.77  | 14.50 | -4.5 | 7.0         |
| 279.0363 | *         | 765623  | 14.47  | 2.24  | 2.2  | 6.5         |
| 289.0435 | *         | 297765  | 5.63   | 0.87  | 3.1  | 8.0         |
| 291.0411 | *         | 296996  | 5.61   | 0.87  | -2.6 | 7.5         |
| 348.0838 | *         | 778402  | 14.71  | 2.27  | -0.1 | 8.0         |
| 350.0824 | *         | 773728  | 14.62  | 2.26  | -2.0 | 23.0        |
|          |           |         |        |       |      | C26.H10.N2  |

HREIMS

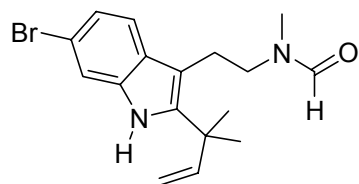

6 (two rotamers)
